# Supplementary material for: Extracorporeal Photopheresis as a Possible Therapeutic Approach for Adults with Severe and Critical COVID-19 Non-Responsive to Standard Treatment: A Pilot Investigational Study
Source: MDPI journal article supplement (doi:10.3390/jcm12155000), 2023-07-29

Patient 1 ECP MNC 1

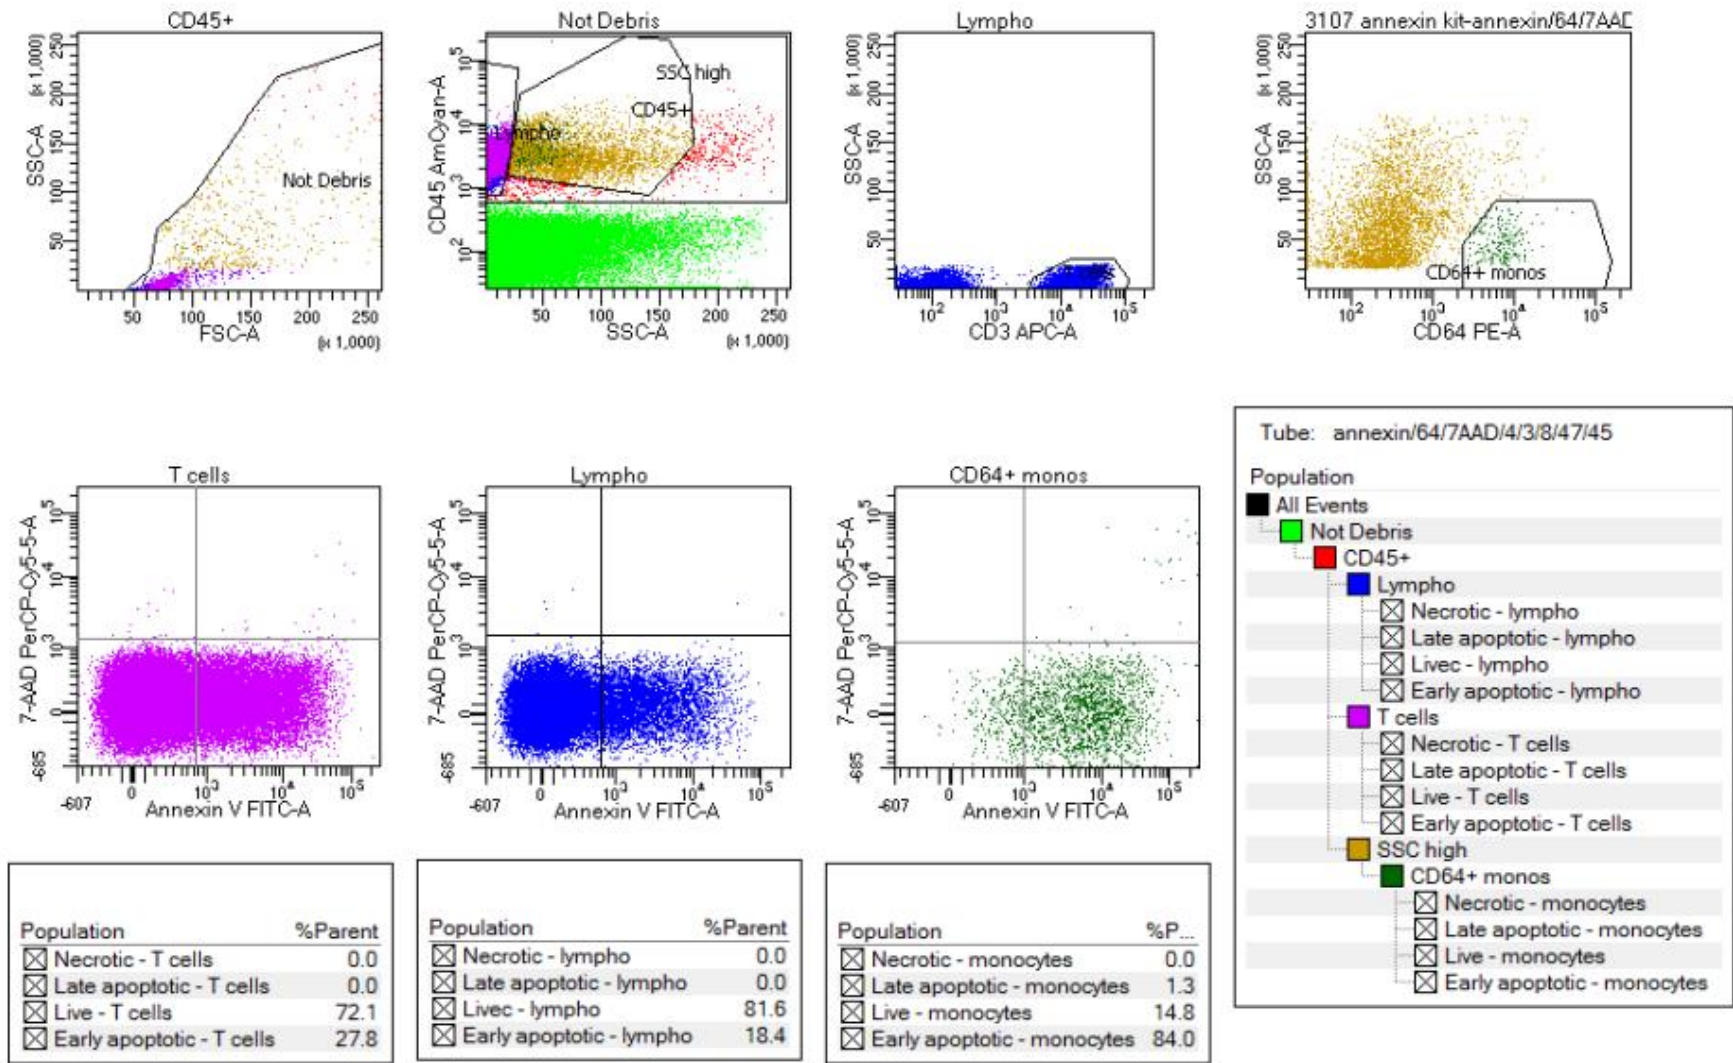

Patient 1 ECP MNC 2

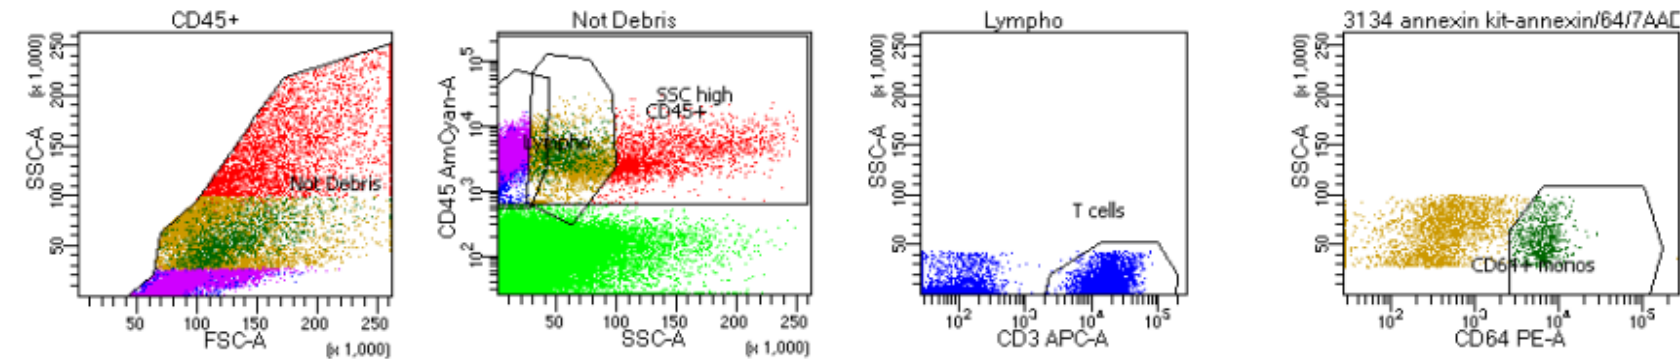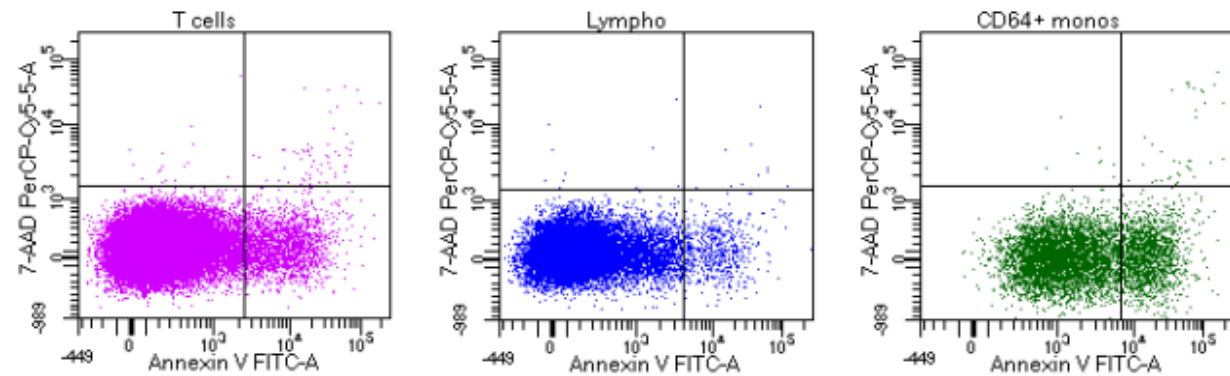

| Population                                                    |  | %Parent |
|---------------------------------------------------------------|--|---------|
| <input checked="" type="checkbox"/> Necrotic - T cells        |  | 0.0     |
| <input checked="" type="checkbox"/> Late apoptotic - T cells  |  | 0.2     |
| <input checked="" type="checkbox"/> Live - T cells            |  | 94.5    |
| <input checked="" type="checkbox"/> Early apoptotic - T cells |  | 5.3     |

| Population                                                   |  | %Parent |
|--------------------------------------------------------------|--|---------|
| <input checked="" type="checkbox"/> Necrotic - lympho        |  | 0.1     |
| <input checked="" type="checkbox"/> Late apoptotic - lympho  |  | 0.1     |
| <input checked="" type="checkbox"/> Live - lympho            |  | 96.9    |
| <input checked="" type="checkbox"/> Early apoptotic - lympho |  | 3.0     |

| Population                                                      |  | %P... |
|-----------------------------------------------------------------|--|-------|
| <input checked="" type="checkbox"/> Necrotic - monocytes        |  | 0.2   |
| <input checked="" type="checkbox"/> Late apoptotic - monocytes  |  | 0.6   |
| <input checked="" type="checkbox"/> Live - monocytes            |  | 74.0  |
| <input checked="" type="checkbox"/> Early apoptotic - monocytes |  | 25.2  |

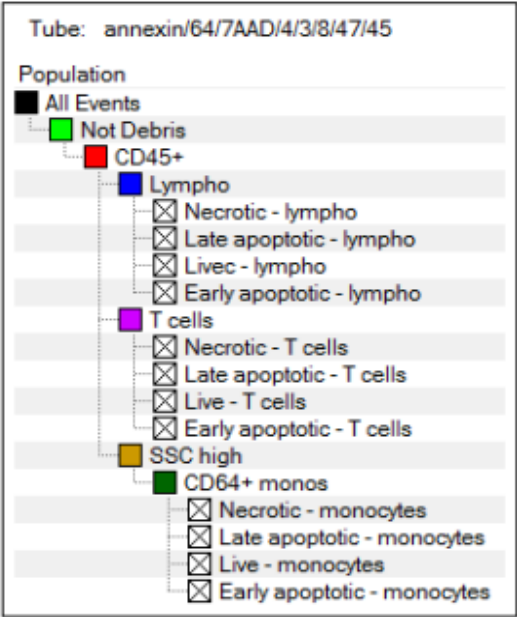

Patient 1 ECP MNC 3

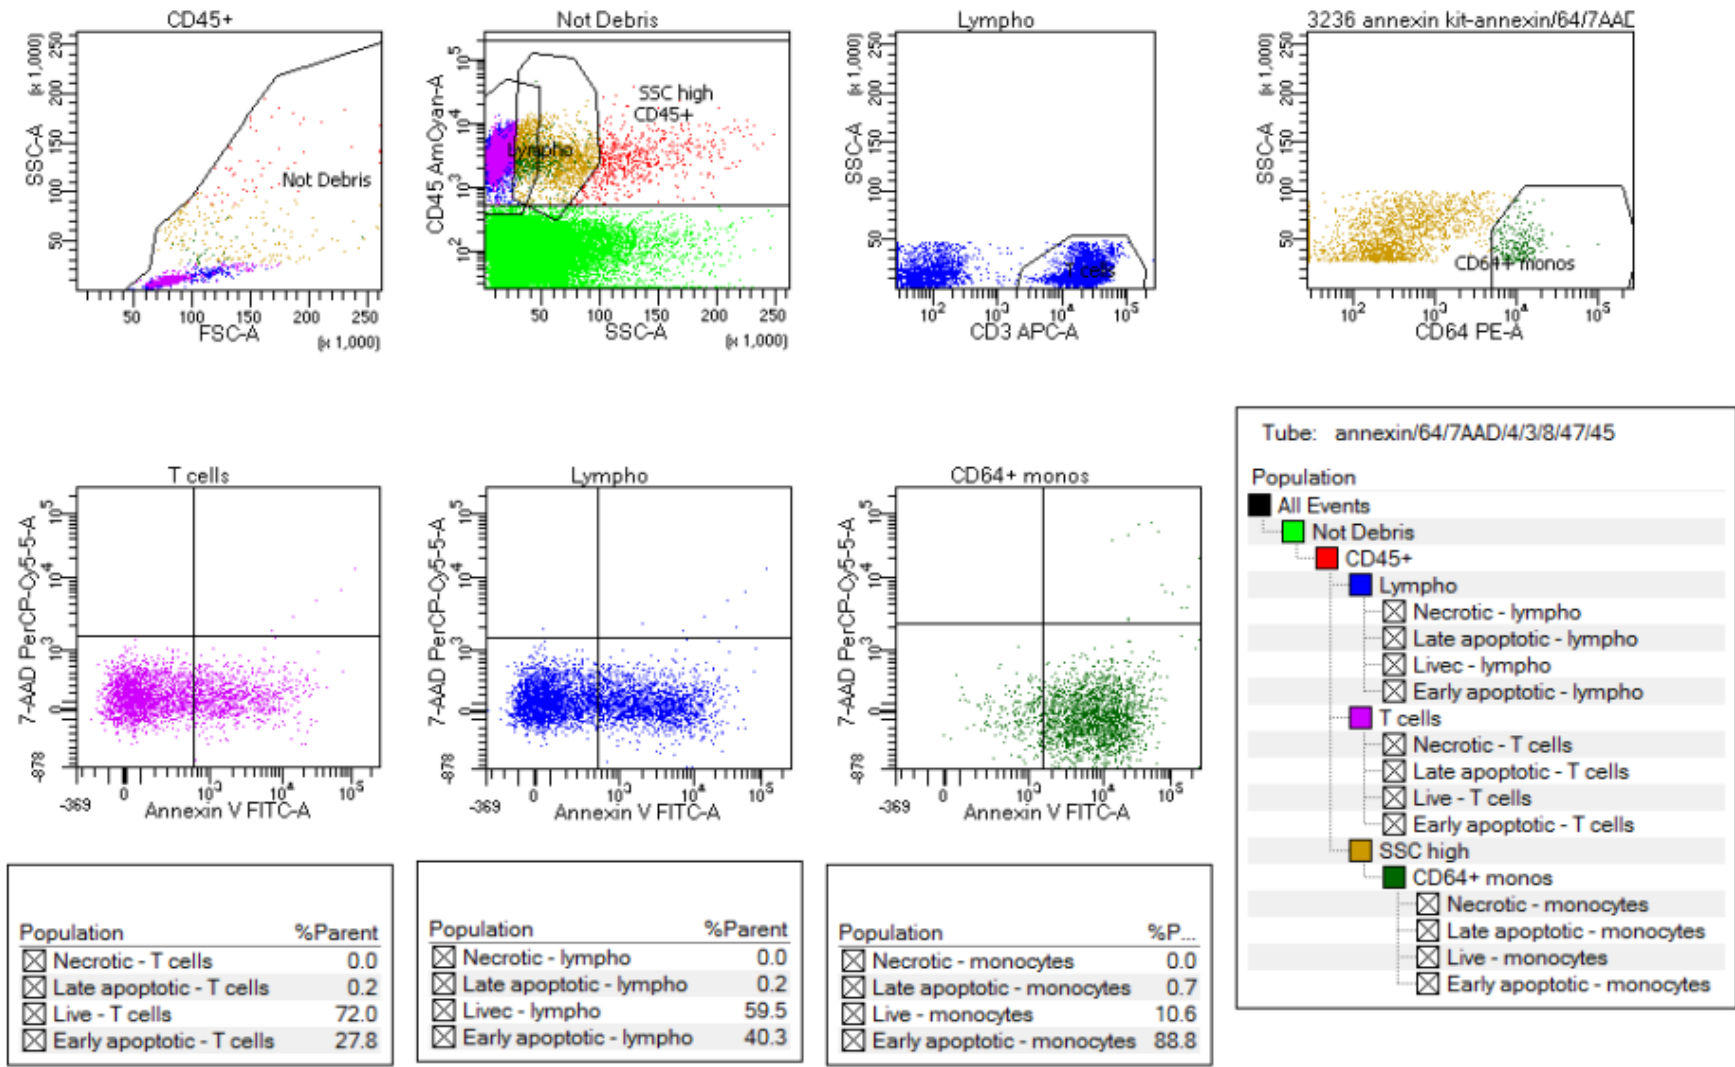

Patient 1 ECP MNC 4

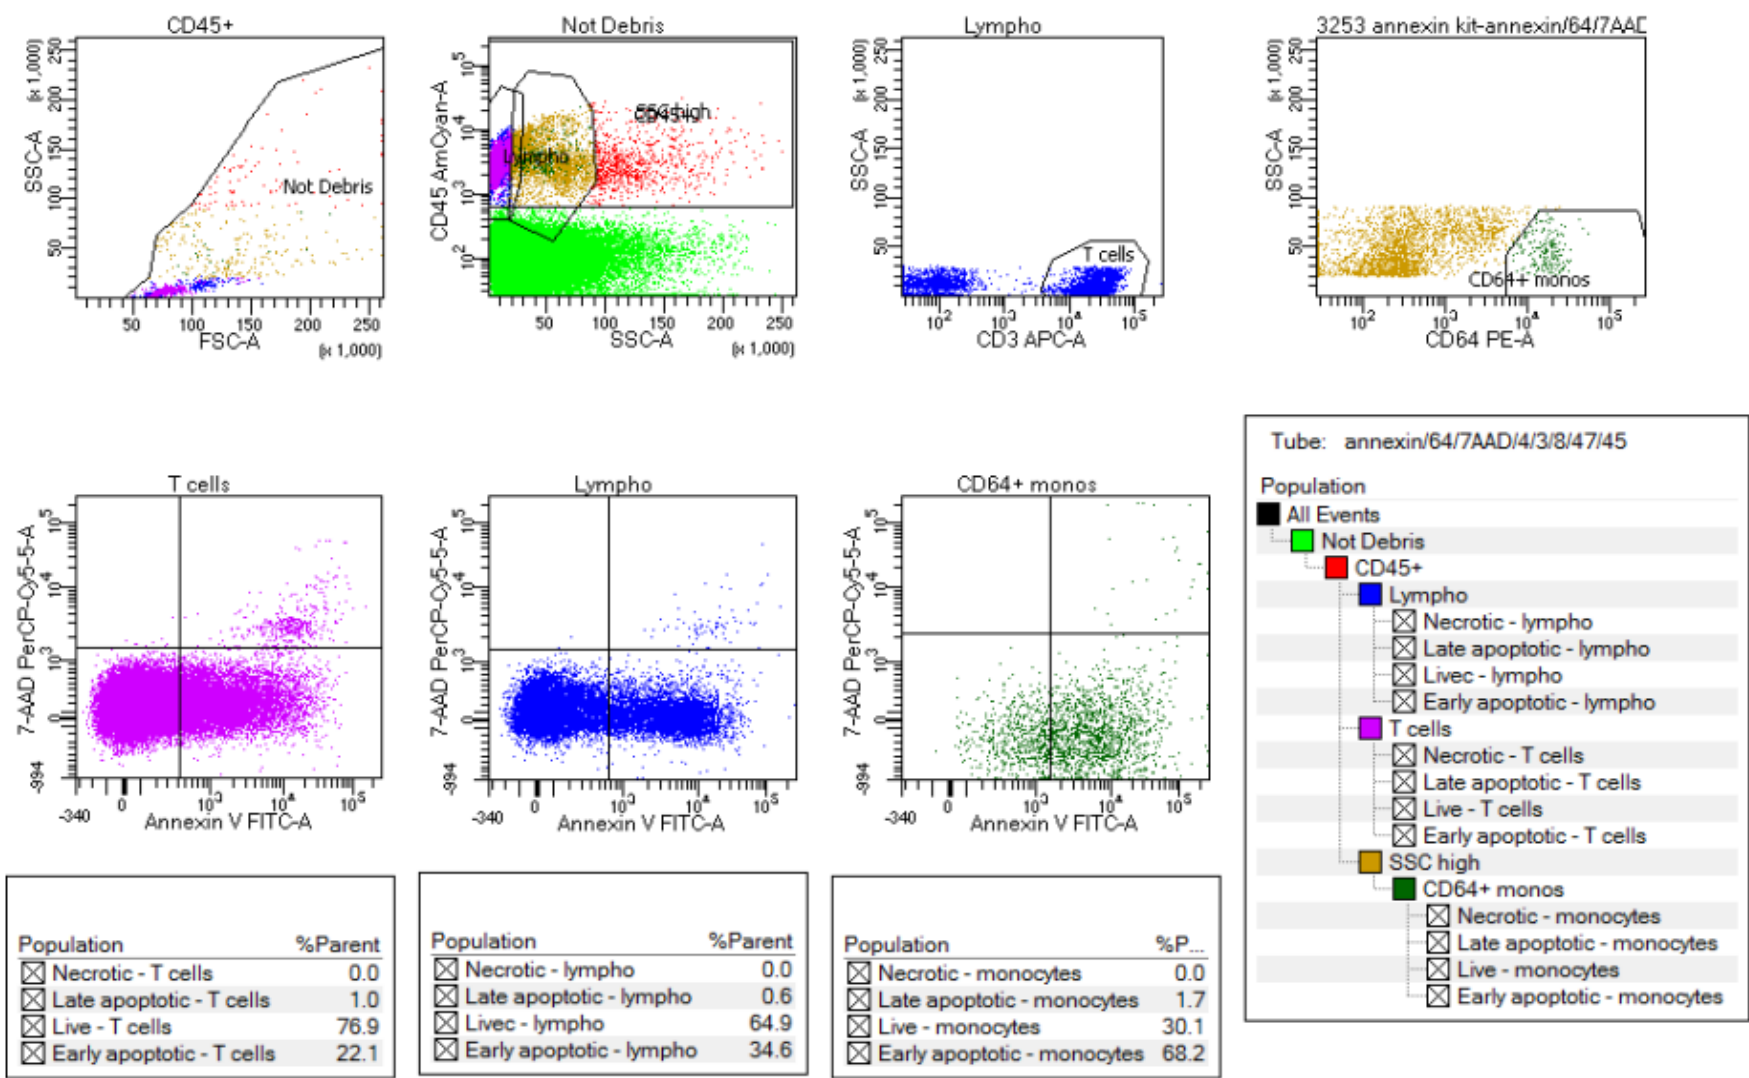



Patient 2 ECP MNC 1

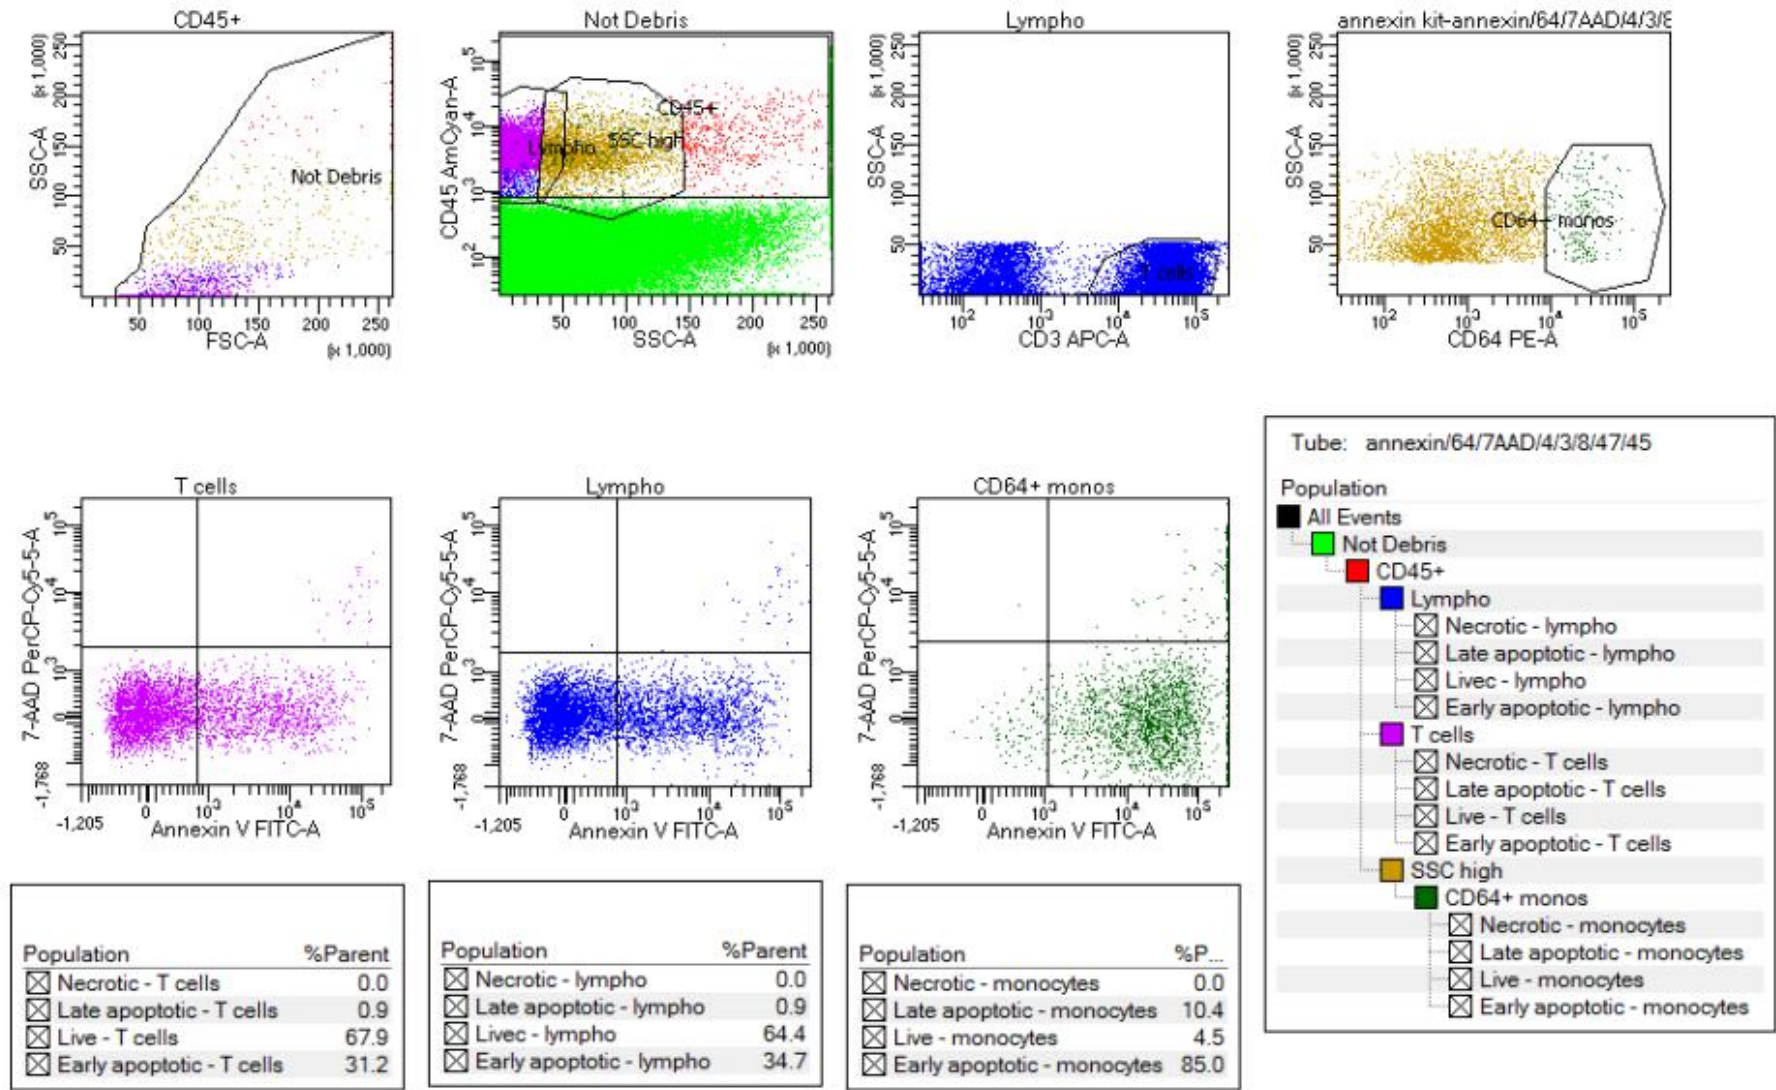

Patient 2 ECP MNC 2

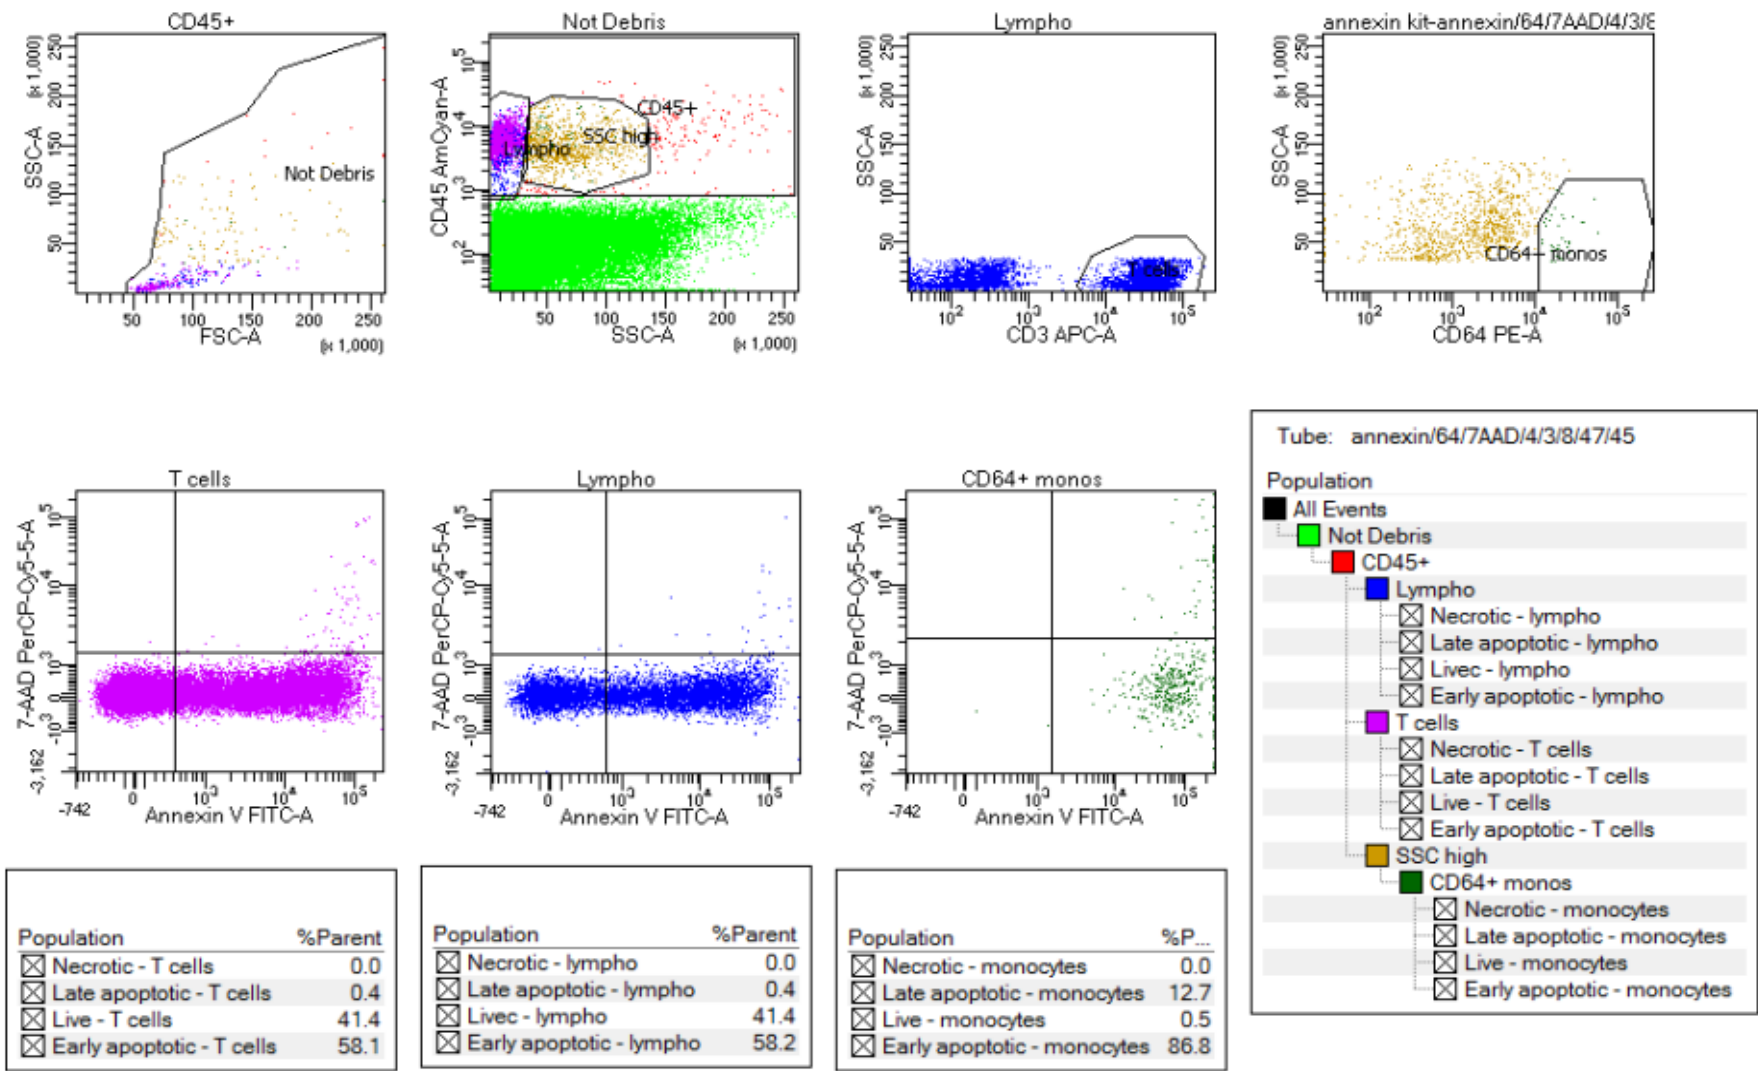

Patient 2 ECP MNC 3

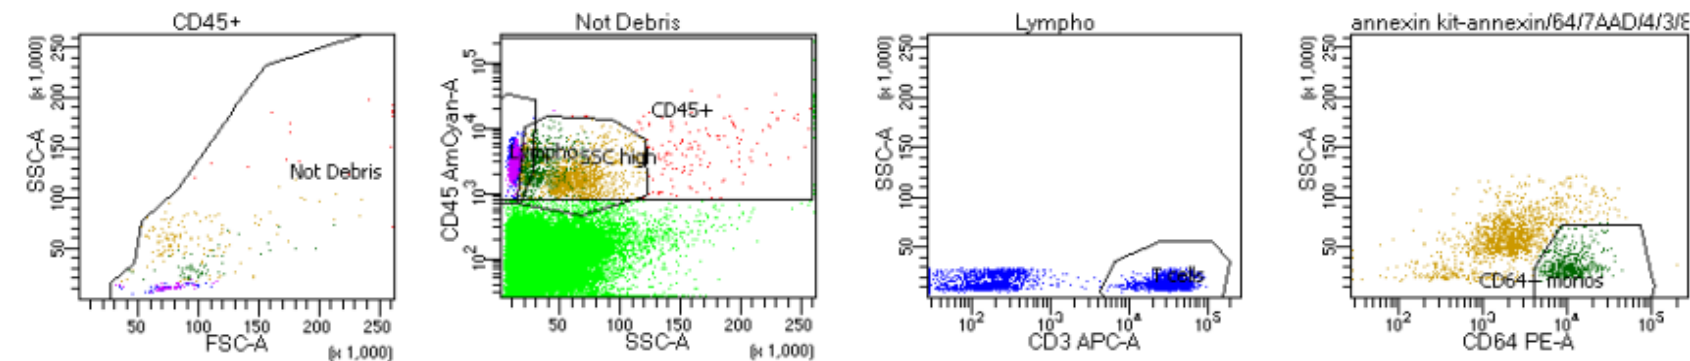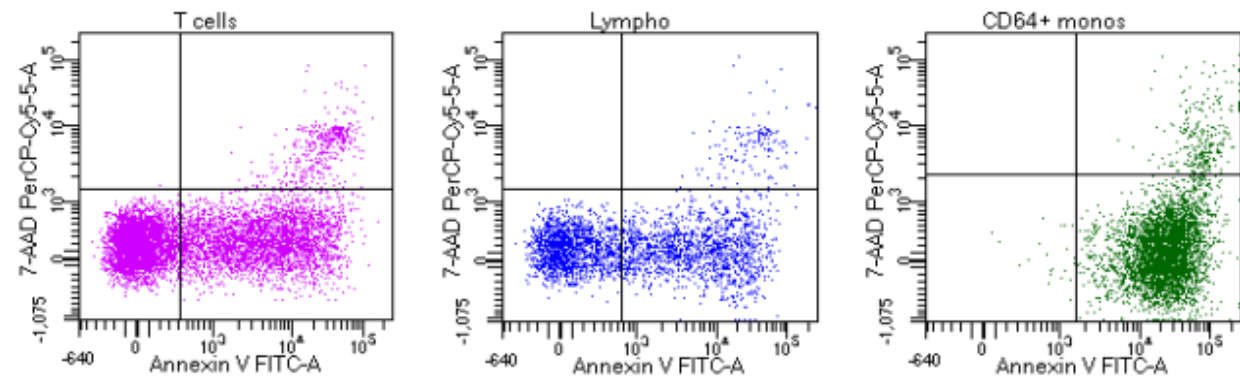

| Population                                                    | %Parent |
|---------------------------------------------------------------|---------|
| <input checked="" type="checkbox"/> Necrotic - T cells        | 0.0     |
| <input checked="" type="checkbox"/> Late apoptotic - T cells  | 5.2     |
| <input checked="" type="checkbox"/> Live - T cells            | 51.5    |
| <input checked="" type="checkbox"/> Early apoptotic - T cells | 43.2    |

| Population                                                   | %Parent |
|--------------------------------------------------------------|---------|
| <input checked="" type="checkbox"/> Necrotic - lympho        | 0.0     |
| <input checked="" type="checkbox"/> Late apoptotic - lympho  | 4.3     |
| <input checked="" type="checkbox"/> Live - lympho            | 49.1    |
| <input checked="" type="checkbox"/> Early apoptotic - lympho | 46.6    |

| Population                                                      | %P... |
|-----------------------------------------------------------------|-------|
| <input checked="" type="checkbox"/> Necrotic - monocytes        | 0.0   |
| <input checked="" type="checkbox"/> Late apoptotic - monocytes  | 6.5   |
| <input checked="" type="checkbox"/> Live - monocytes            | 0.5   |
| <input checked="" type="checkbox"/> Early apoptotic - monocytes | 93.0  |

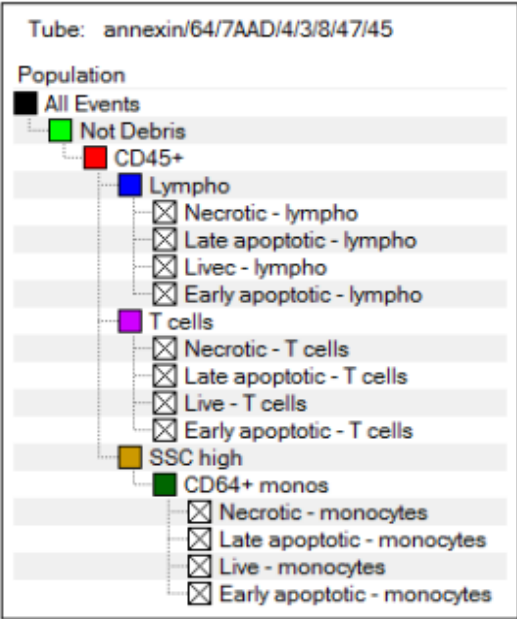

Patient 2 ECP MNC 4

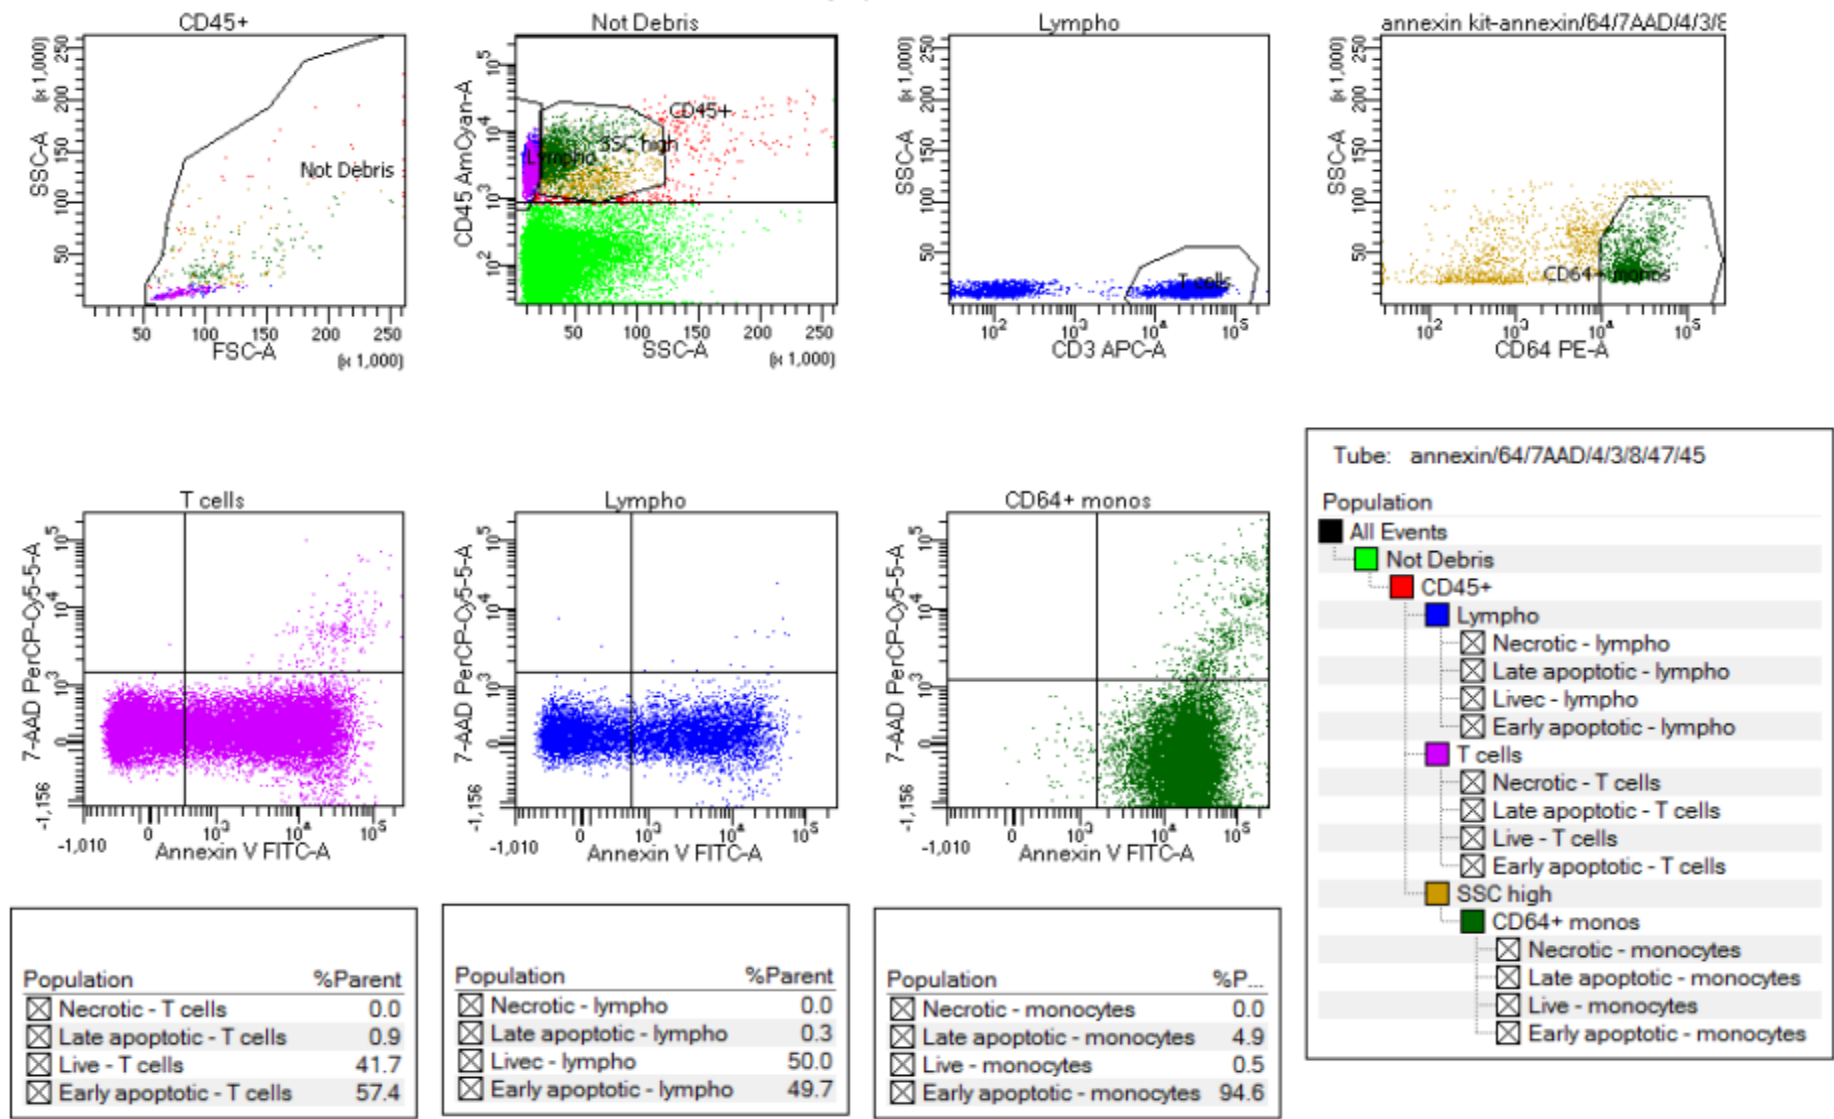



Patient 3 ECP MNC 1

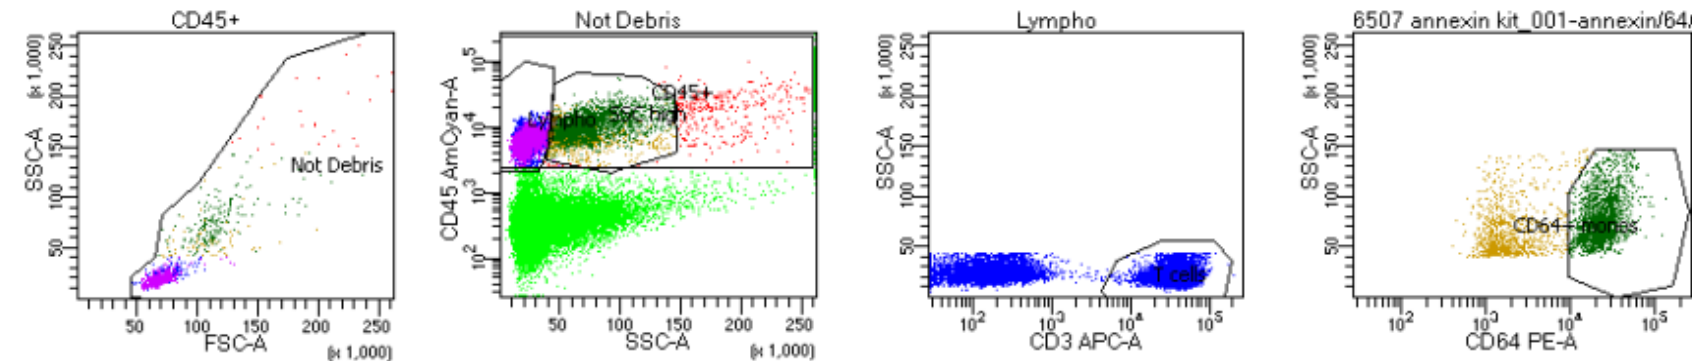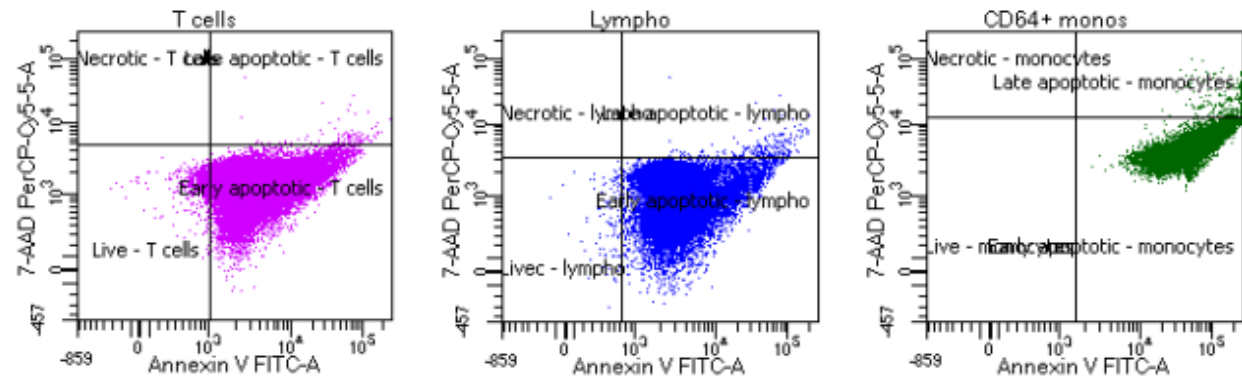

| Population                                                    | %Parent |
|---------------------------------------------------------------|---------|
| <input checked="" type="checkbox"/> Necrotic - T cells        | 0.0     |
| <input checked="" type="checkbox"/> Late apoptotic - T cells  | 0.3     |
| <input checked="" type="checkbox"/> Live - T cells            | 2.1     |
| <input checked="" type="checkbox"/> Early apoptotic - T cells | 97.7    |

| Population                                                   | %Parent |
|--------------------------------------------------------------|---------|
| <input checked="" type="checkbox"/> Necrotic - lympho        | 0.0     |
| <input checked="" type="checkbox"/> Late apoptotic - lympho  | 1.3     |
| <input checked="" type="checkbox"/> Live - lympho            | 0.6     |
| <input checked="" type="checkbox"/> Early apoptotic - lympho | 98.1    |

| Population                                                      | %P... |
|-----------------------------------------------------------------|-------|
| <input checked="" type="checkbox"/> Necrotic - monocytes        | 0.0   |
| <input checked="" type="checkbox"/> Late apoptotic - monocytes  | 1.6   |
| <input checked="" type="checkbox"/> Live - monocytes            | 0.0   |
| <input checked="" type="checkbox"/> Early apoptotic - monocytes | 98.4  |

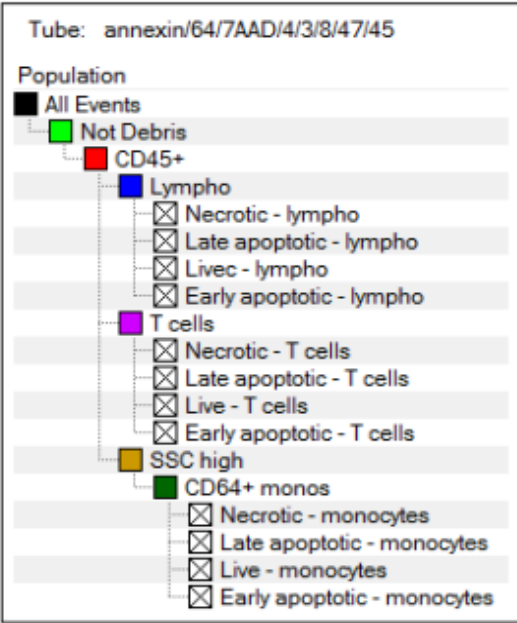

Patient 3 ECP MNC 2

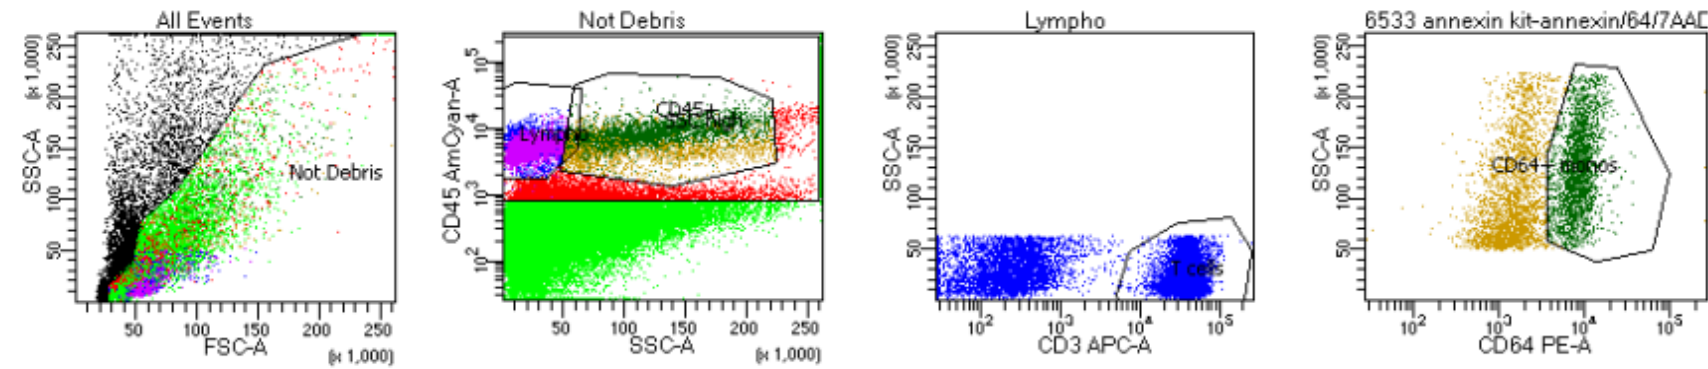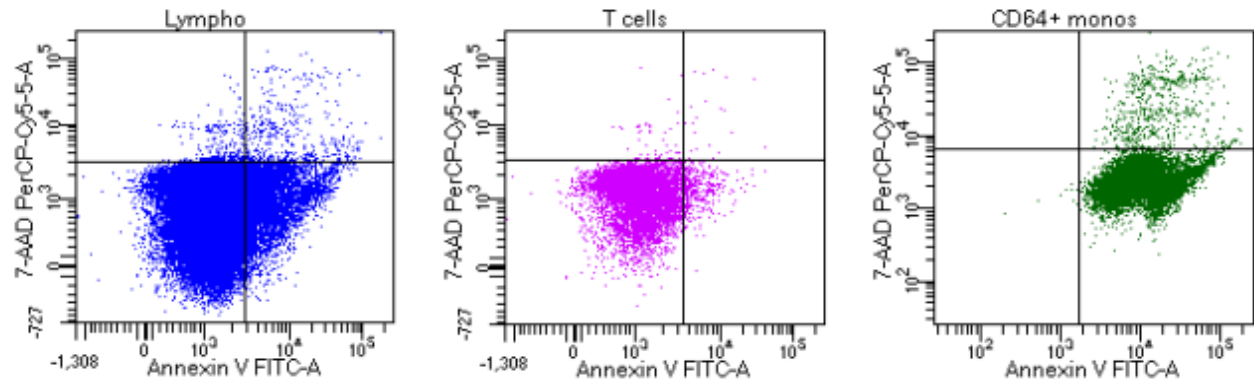

| Population                                                    |  | %Parent |
|---------------------------------------------------------------|--|---------|
| <input checked="" type="checkbox"/> Necrotic - T cells        |  | 1.0     |
| <input checked="" type="checkbox"/> Late apoptotic - T cells  |  | 0.6     |
| <input checked="" type="checkbox"/> Live - T cells            |  | 89.2    |
| <input checked="" type="checkbox"/> Early apoptotic - T cells |  | 9.2     |

| Population                                                   |  | %Parent |
|--------------------------------------------------------------|--|---------|
| <input checked="" type="checkbox"/> Necrotic - lympho        |  | 0.5     |
| <input checked="" type="checkbox"/> Late apoptotic - lympho  |  | 0.6     |
| <input checked="" type="checkbox"/> Live - lympho            |  | 89.1    |
| <input checked="" type="checkbox"/> Early apoptotic - lympho |  | 9.8     |

| Population                                                      |  | %P... |
|-----------------------------------------------------------------|--|-------|
| <input checked="" type="checkbox"/> Necrotic - monocytes        |  | 0.0   |
| <input checked="" type="checkbox"/> Late apoptotic - monocytes  |  | 2.7   |
| <input checked="" type="checkbox"/> Live - monocytes            |  | 0.0   |
| <input checked="" type="checkbox"/> Early apoptotic - monocytes |  | 97.2  |

Tube: annexin/64/7AAD/4/3/8/47/45

Population

- ☒ All Events
- ☒ Not Debris
  - ☒ CD45+
    - ☒ Lympho
      - ☒ Necrotic - lympho
      - ☒ Late apoptotic - lympho
      - ☒ Live - lympho
      - ☒ Early apoptotic - lympho
    - ☒ T cells
      - ☒ Necrotic - T cells
      - ☒ Late apoptotic - T cells
      - ☒ Live - T cells
      - ☒ Early apoptotic - T cells
    - ☒ SSC high
      - ☒ CD64+ monos
        - ☒ Necrotic - monocytes
        - ☒ Late apoptotic - monocytes
        - ☒ Live - monocytes
        - ☒ Early apoptotic - monocytes

Patient 3 ECP MNC 3

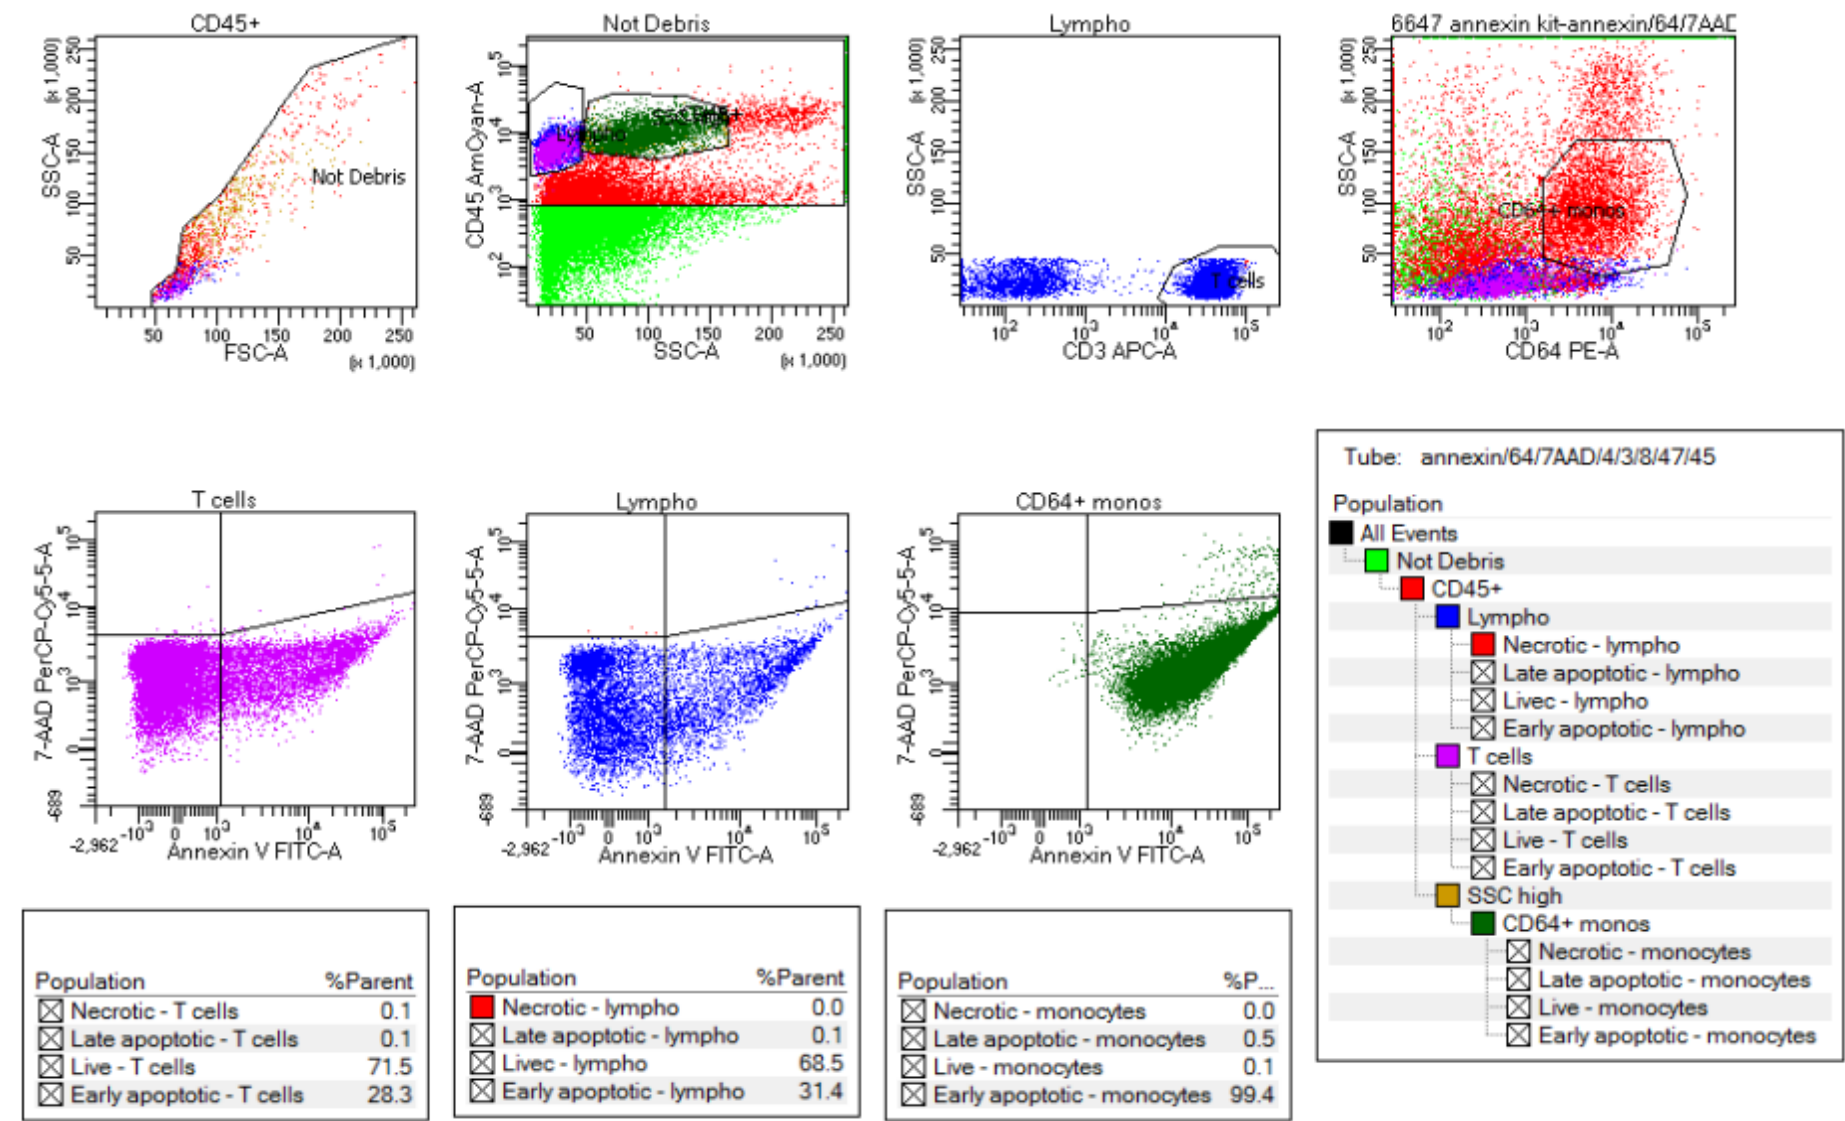

Patient 3 ECP MNC 4

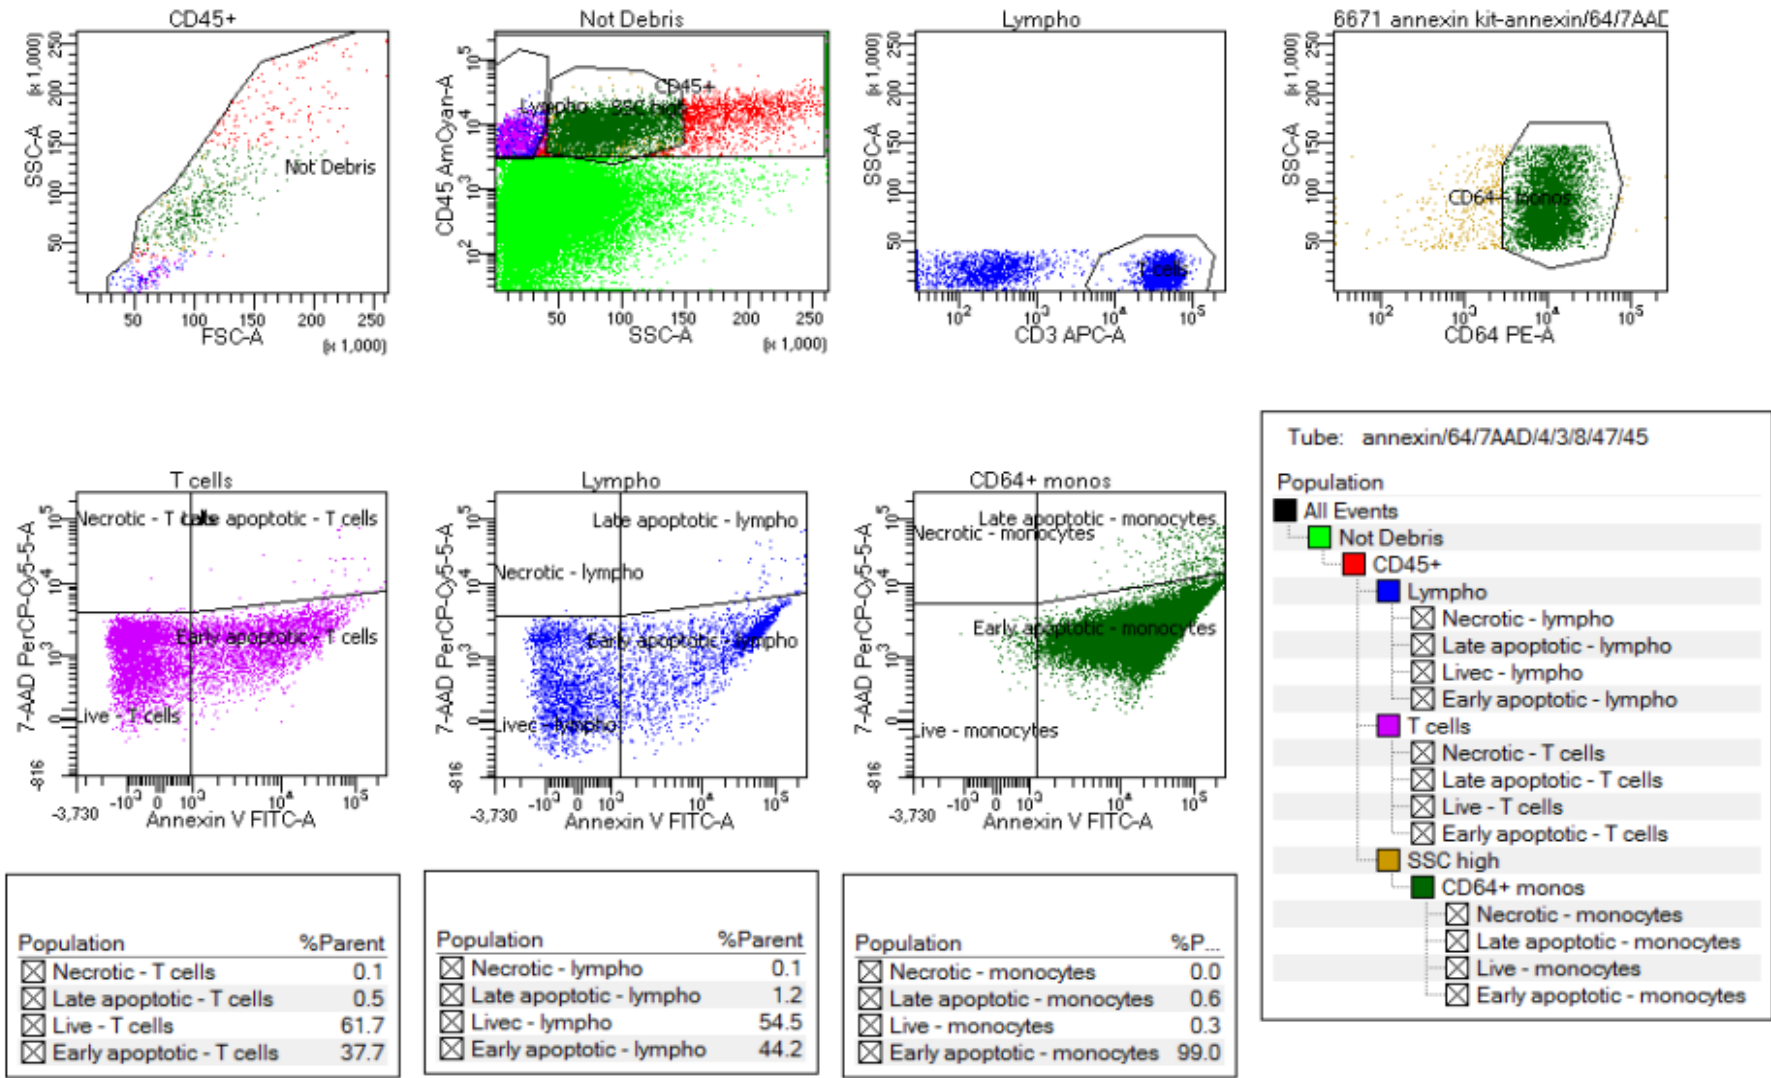



Patient 4 ECP MNC 1

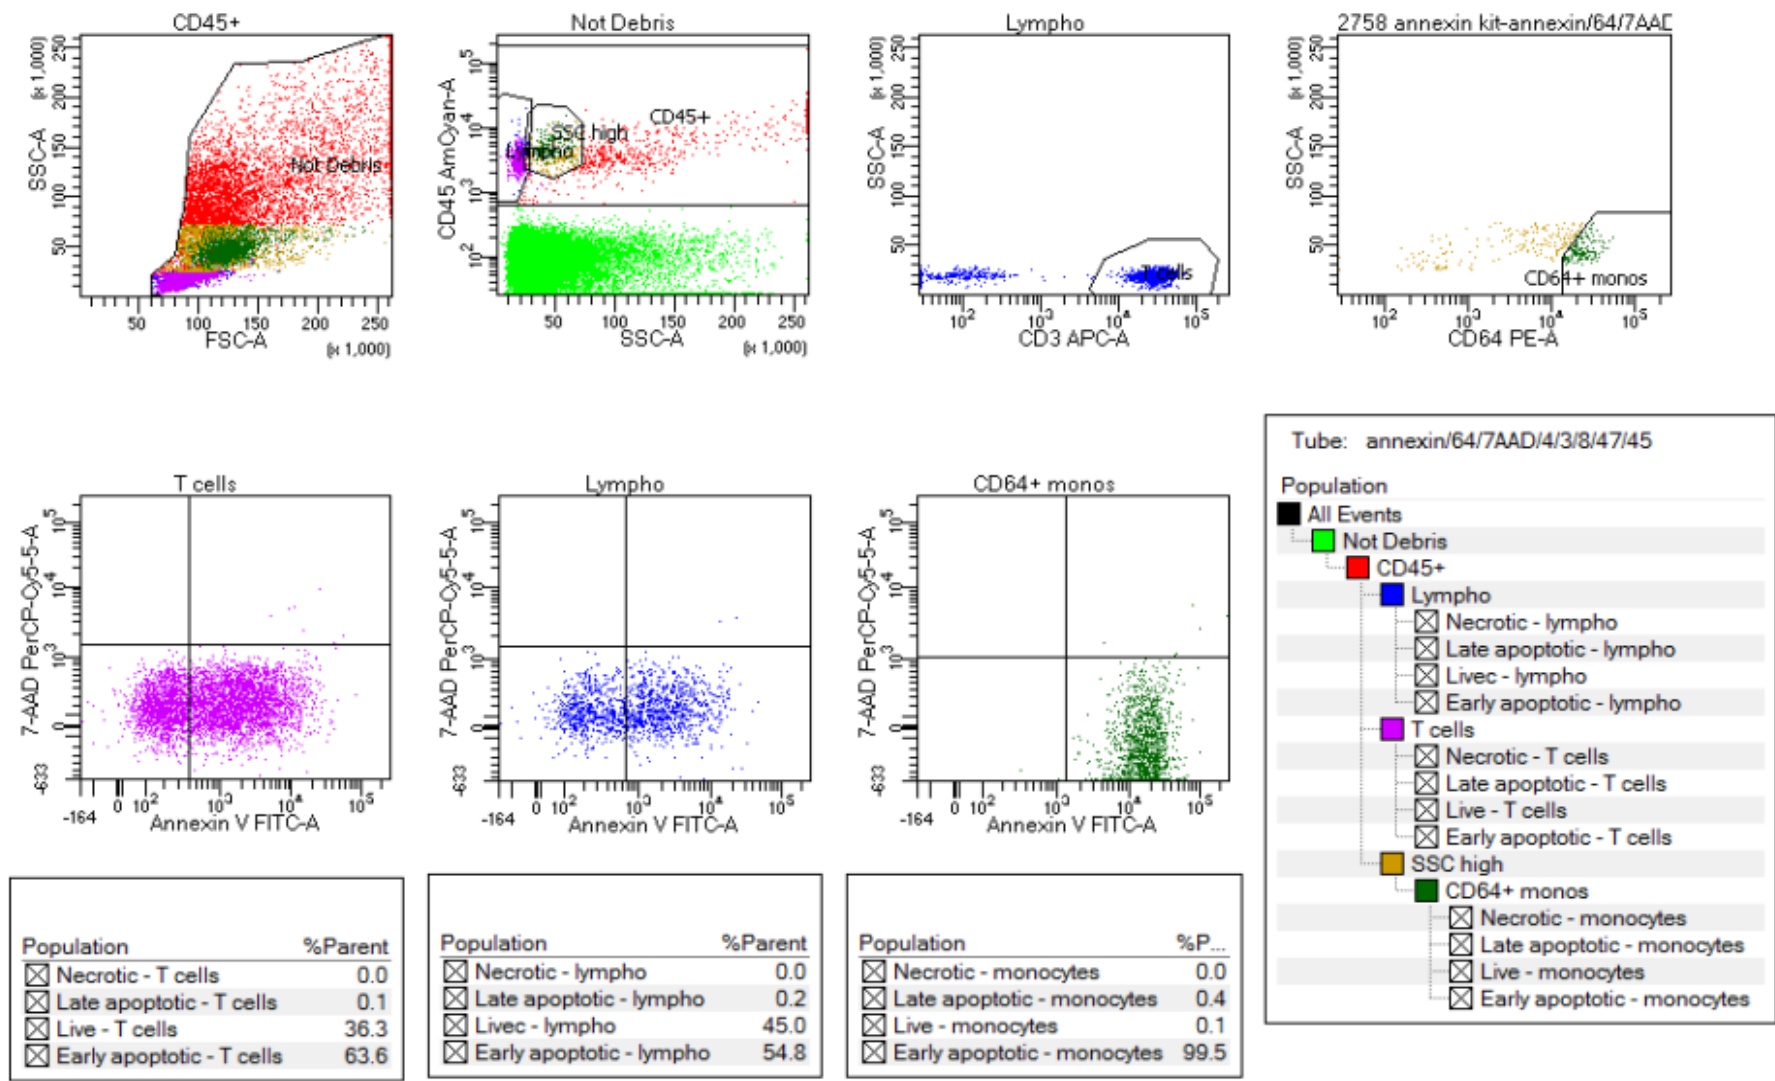

Patient 4 ECP MNC 2

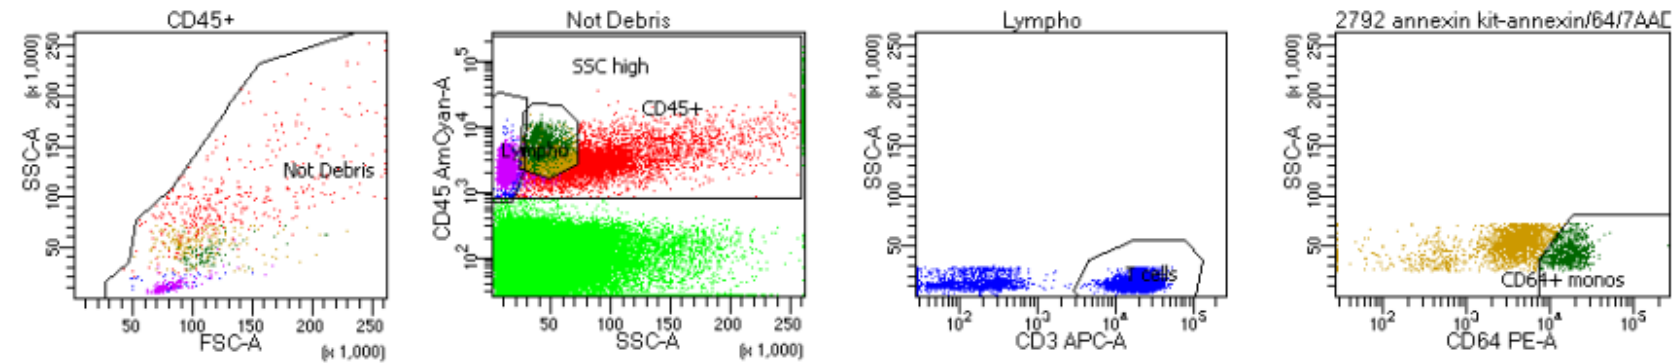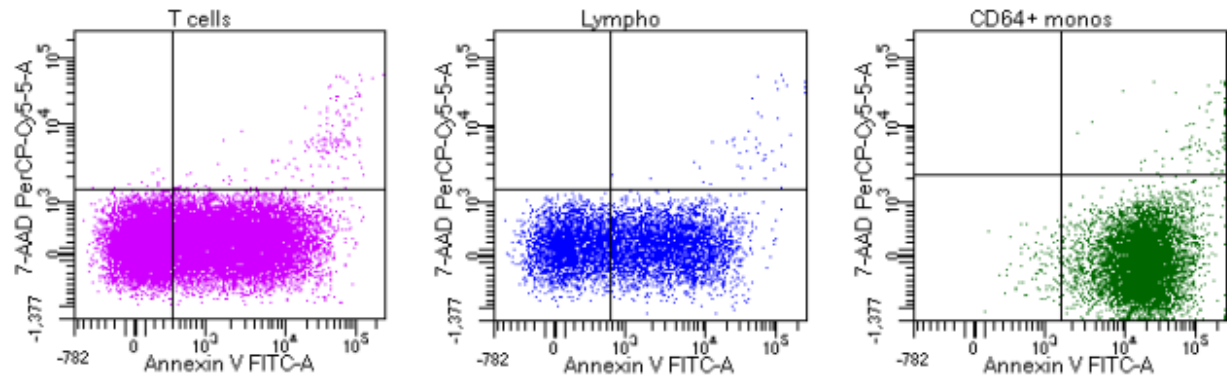

| Population                | %Parent |
|---------------------------|---------|
| Necrotic - T cells        | 0.1     |
| Late apoptotic - T cells  | 0.8     |
| Live - T cells            | 38.6    |
| Early apoptotic - T cells | 60.6    |

| Population               | %Parent |
|--------------------------|---------|
| Necrotic - lympho        | 0.0     |
| Late apoptotic - lympho  | 0.7     |
| Livec - lympho           | 44.9    |
| Early apoptotic - lympho | 54.4    |

| Population                  | %P... |
|-----------------------------|-------|
| Necrotic - monocytes        | 0.0   |
| Late apoptotic - monocytes  | 1.1   |
| Live - monocytes            | 1.1   |
| Early apoptotic - monocytes | 97.9  |

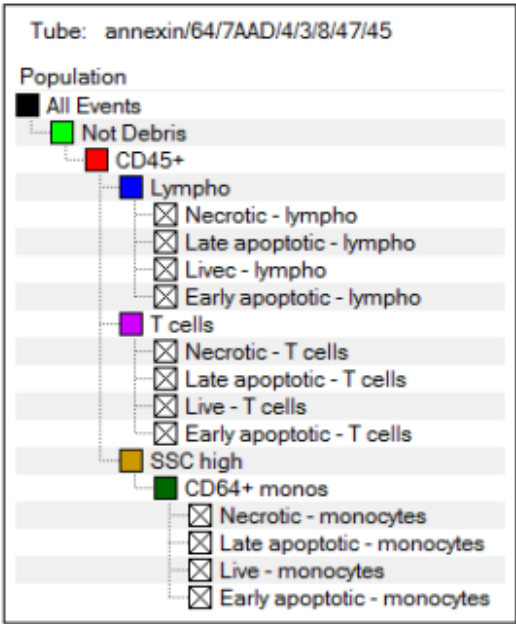

Patient 4 ECP MNC 3

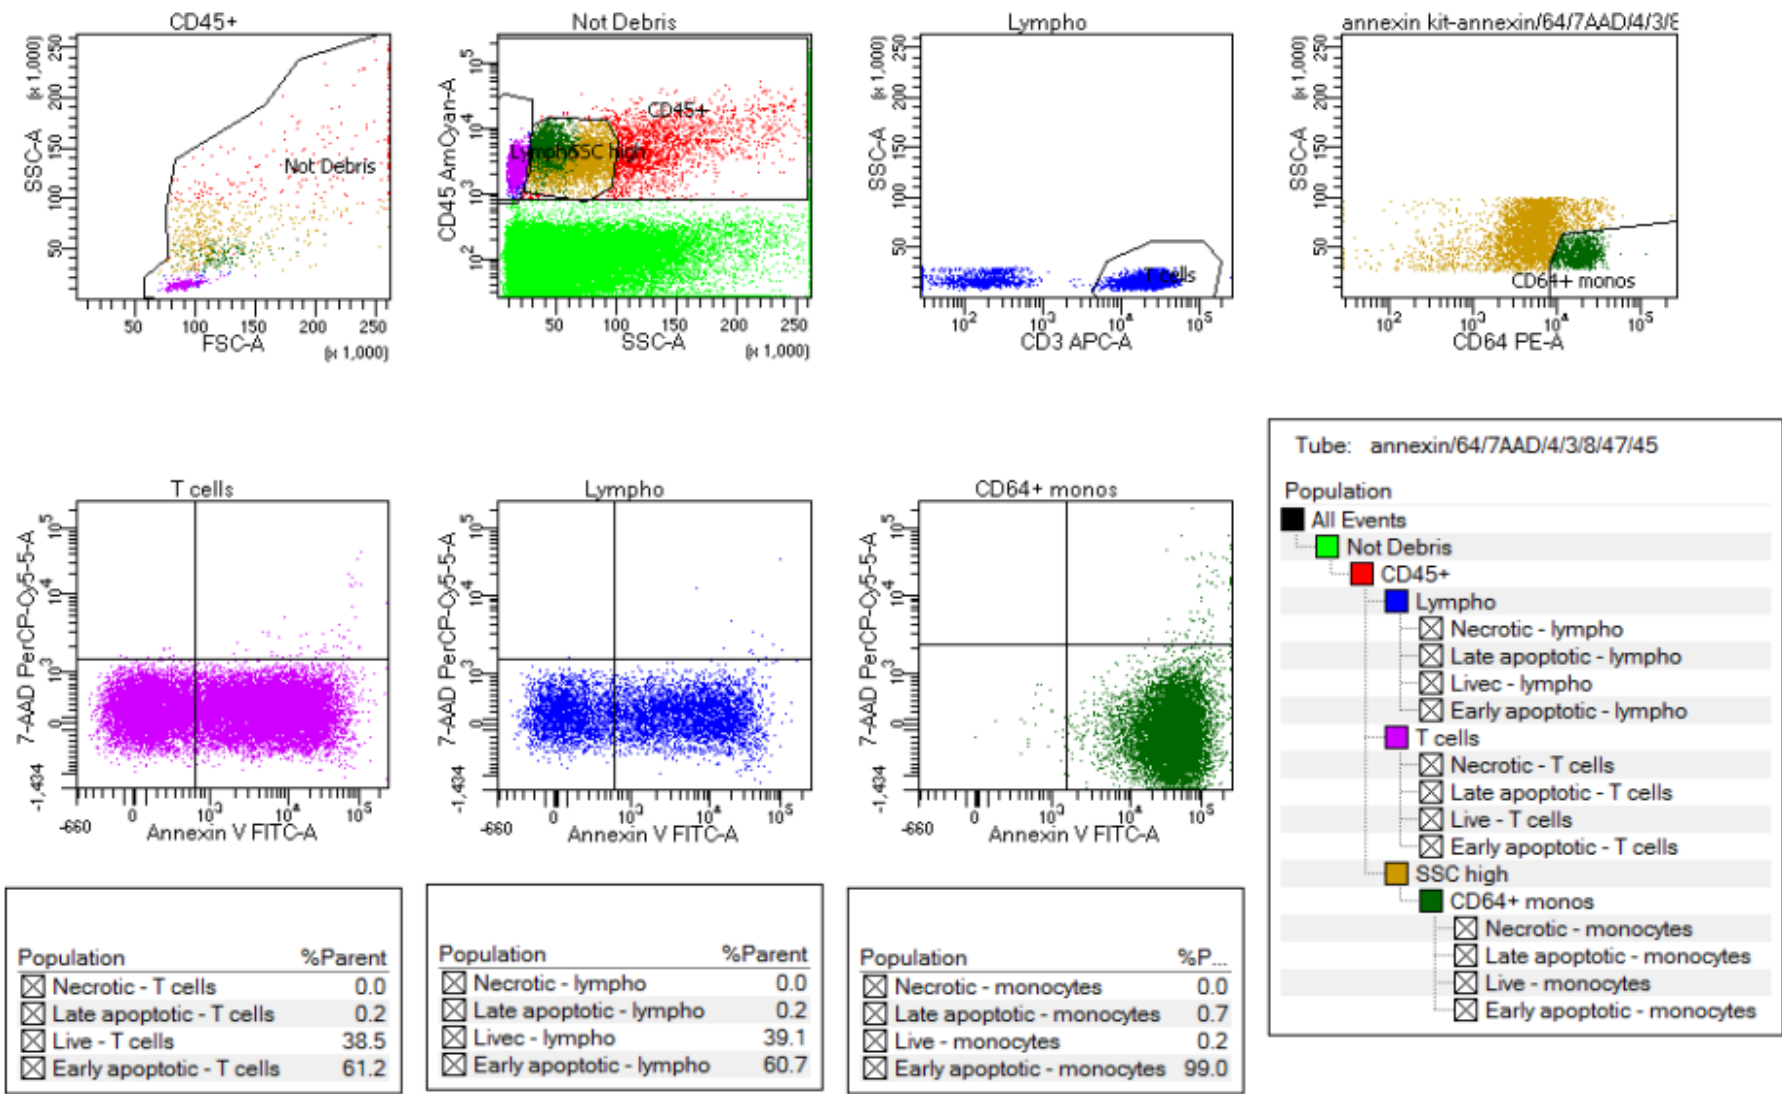

Patient 4 ECP MNC 4

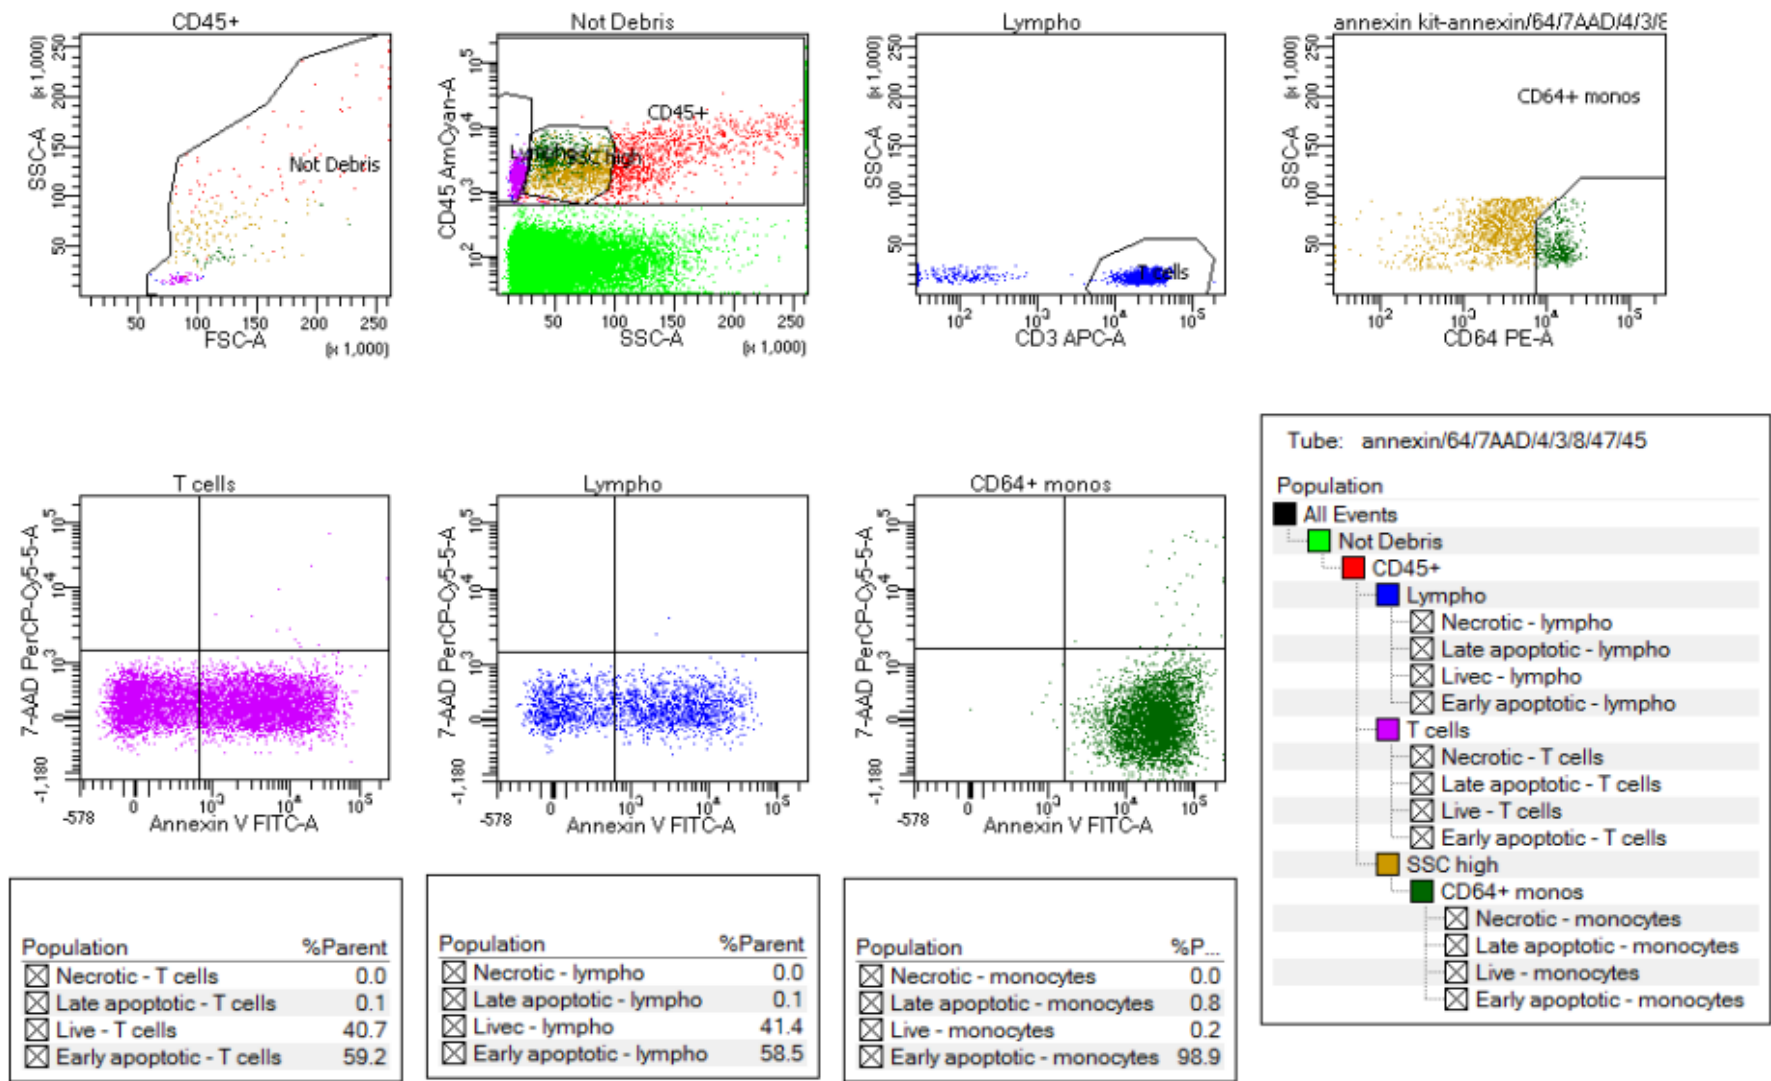



Patient 5 ECP MNC 1

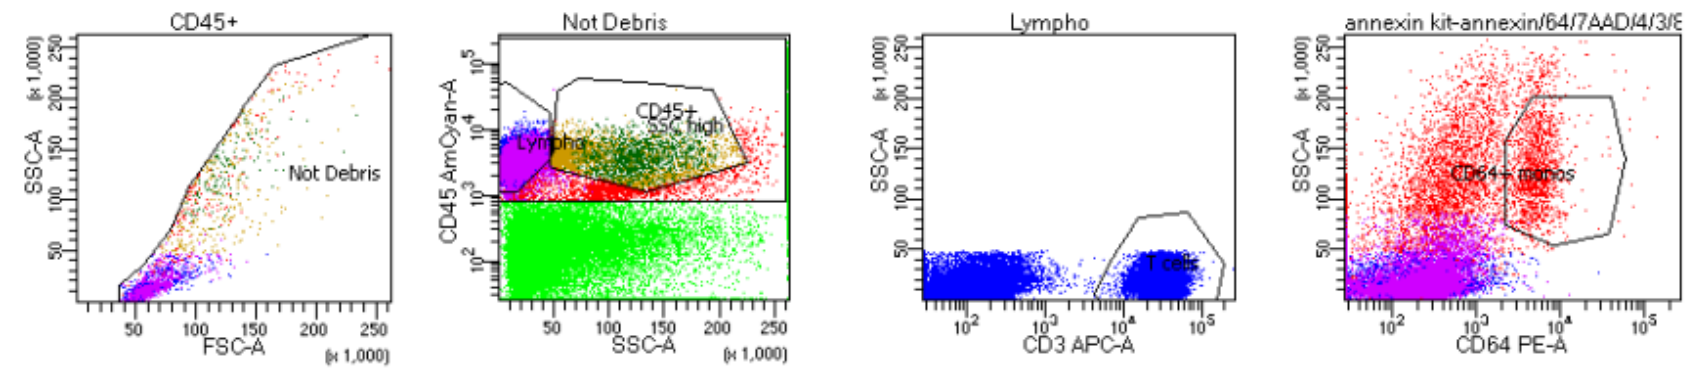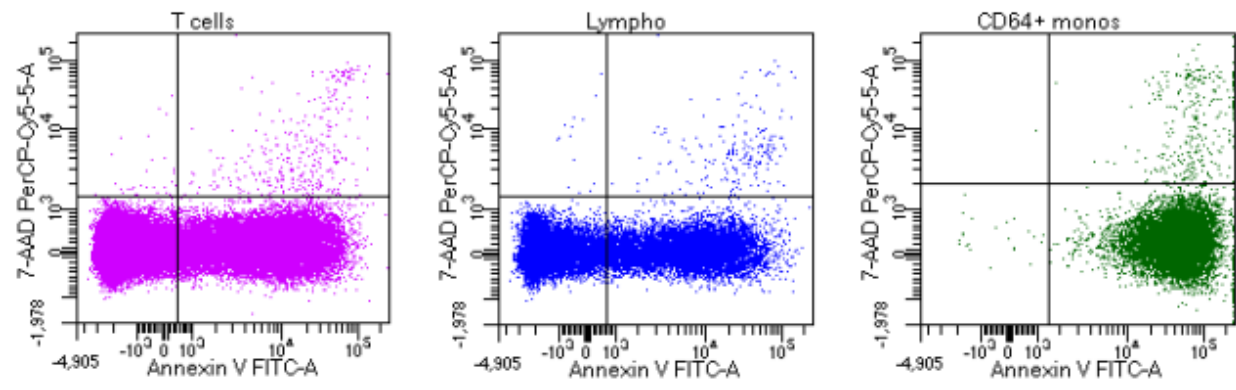

| Population                                                    | %Parent |
|---------------------------------------------------------------|---------|
| <input checked="" type="checkbox"/> Necrotic - T cells        | 0.0     |
| <input checked="" type="checkbox"/> Late apoptotic - T cells  | 0.5     |
| <input checked="" type="checkbox"/> Live - T cells            | 67.6    |
| <input checked="" type="checkbox"/> Early apoptotic - T cells | 31.9    |

| Population                                                   | %Parent |
|--------------------------------------------------------------|---------|
| <input checked="" type="checkbox"/> Necrotic - lympho        | 0.0     |
| <input checked="" type="checkbox"/> Late apoptotic - lympho  | 0.7     |
| <input checked="" type="checkbox"/> Live - lympho            | 68.0    |
| <input checked="" type="checkbox"/> Early apoptotic - lympho | 31.3    |

| Population                                                      | %P... |
|-----------------------------------------------------------------|-------|
| <input checked="" type="checkbox"/> Necrotic - monocytes        | 0.0   |
| <input checked="" type="checkbox"/> Late apoptotic - monocytes  | 2.4   |
| <input checked="" type="checkbox"/> Live - monocytes            | 0.2   |
| <input checked="" type="checkbox"/> Early apoptotic - monocytes | 97.3  |

Tube: annexin/64/7AAD/4/3/8/47/45

Population

- ☒ All Events
- ☒ Not Debris
- ☒ CD45+
  - ☒ Lympho
    - ☒ Necrotic - lympho
    - ☒ Late apoptotic - lympho
    - ☒ Live - lympho
    - ☒ Early apoptotic - lympho
  - ☒ T cells
    - ☒ Necrotic - T cells
    - ☒ Late apoptotic - T cells
    - ☒ Live - T cells
    - ☒ Early apoptotic - T cells
  - ☒ SSC high
    - ☒ CD64+ monos
      - ☒ Necrotic - monocytes
      - ☒ Late apoptotic - monocytes
      - ☒ Live - monocytes
      - ☒ Early apoptotic - monocytes

Patient 5 ECP MNC 2

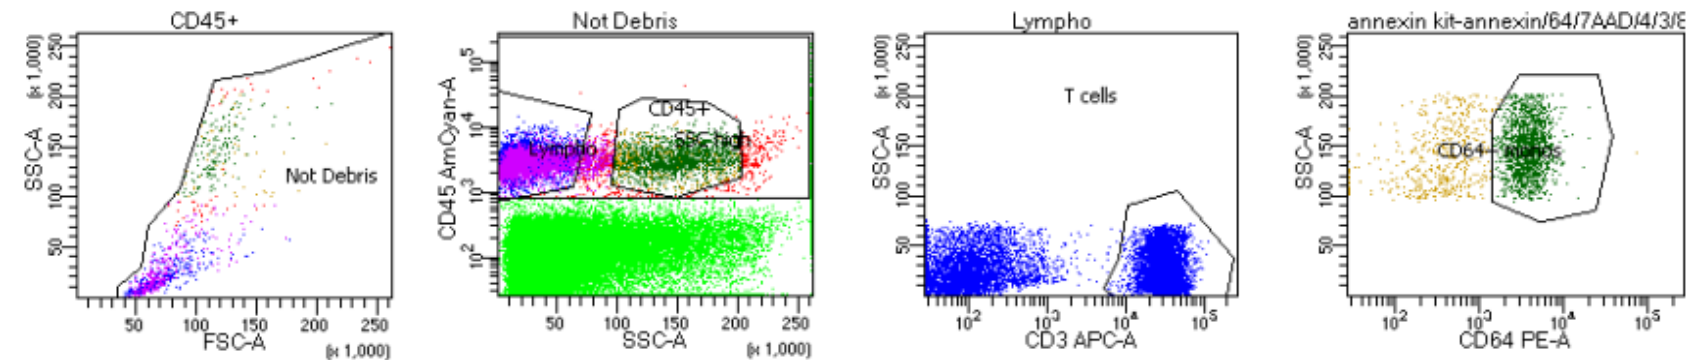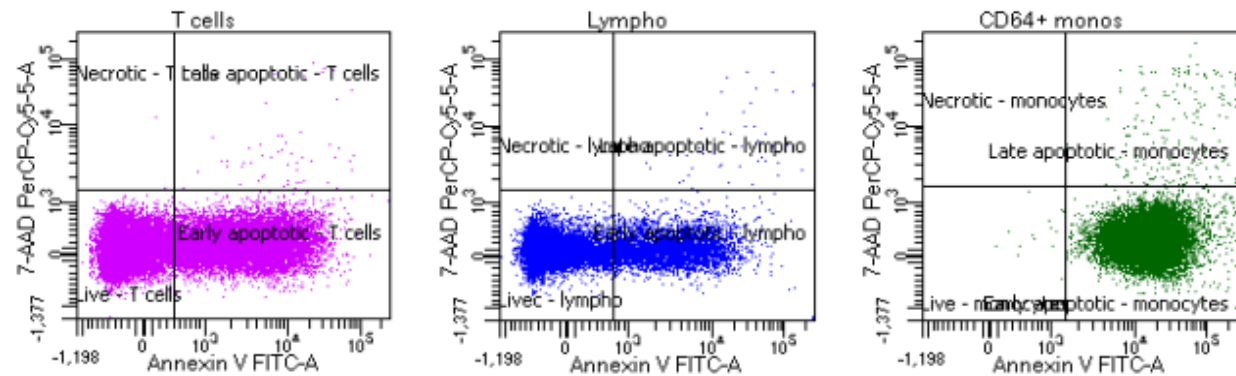

| Population                                                    | %Parent |
|---------------------------------------------------------------|---------|
| <input checked="" type="checkbox"/> Necrotic - T cells        | 0.0     |
| <input checked="" type="checkbox"/> Late apoptotic - T cells  | 0.2     |
| <input checked="" type="checkbox"/> Live - T cells            | 60.8    |
| <input checked="" type="checkbox"/> Early apoptotic - T cells | 39.0    |

| Population                                                   | %Parent |
|--------------------------------------------------------------|---------|
| <input checked="" type="checkbox"/> Necrotic - lympho        | 0.0     |
| <input checked="" type="checkbox"/> Late apoptotic - lympho  | 0.3     |
| <input checked="" type="checkbox"/> Live - lympho            | 68.2    |
| <input checked="" type="checkbox"/> Early apoptotic - lympho | 31.5    |

| Population                                                      | %P... |
|-----------------------------------------------------------------|-------|
| <input checked="" type="checkbox"/> Necrotic - monocytes        | 0.0   |
| <input checked="" type="checkbox"/> Late apoptotic - monocytes  | 1.4   |
| <input checked="" type="checkbox"/> Live - monocytes            | 0.1   |
| <input checked="" type="checkbox"/> Early apoptotic - monocytes | 98.5  |

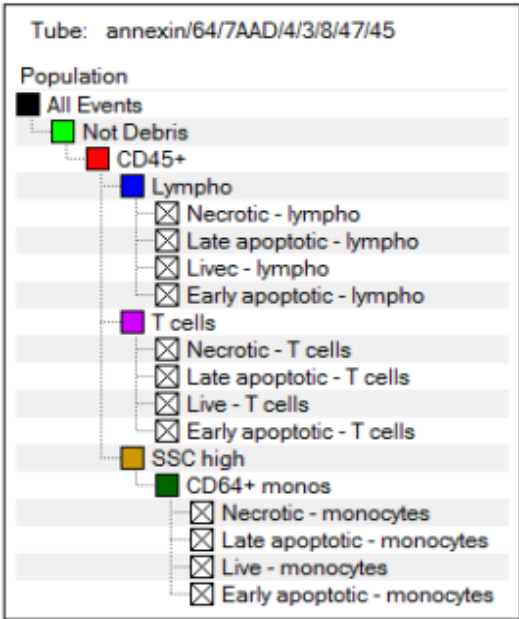

Patient 5 ECP MNC 3

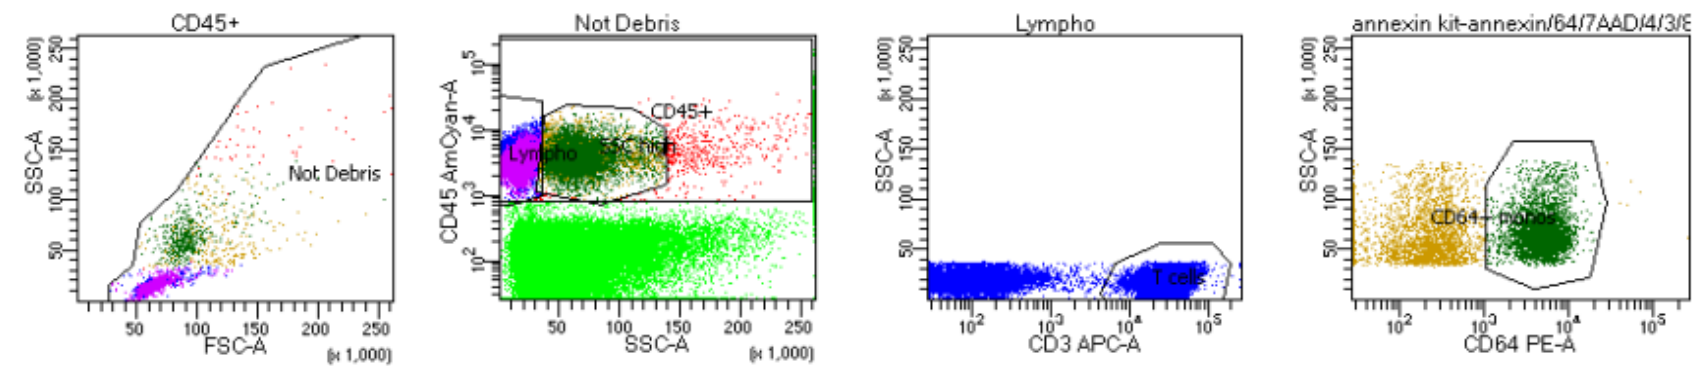

| Population                                                    | %Parent |
|---------------------------------------------------------------|---------|
| <input checked="" type="checkbox"/> Necrotic - T cells        | 0.0     |
| <input checked="" type="checkbox"/> Late apoptotic - T cells  | 0.6     |
| <input checked="" type="checkbox"/> Live - T cells            | 83.4    |
| <input checked="" type="checkbox"/> Early apoptotic - T cells | 16.0    |

| Population                                                   | %Parent |
|--------------------------------------------------------------|---------|
| <input checked="" type="checkbox"/> Necrotic - lympho        | 0.0     |
| <input checked="" type="checkbox"/> Late apoptotic - lympho  | 0.6     |
| <input checked="" type="checkbox"/> Live - lympho            | 79.8    |
| <input checked="" type="checkbox"/> Early apoptotic - lympho | 19.6    |

| Population                                                      | %P... |
|-----------------------------------------------------------------|-------|
| <input checked="" type="checkbox"/> Necrotic - monocytes        | 0.0   |
| <input checked="" type="checkbox"/> Late apoptotic - monocytes  | 2.2   |
| <input checked="" type="checkbox"/> Live - monocytes            | 0.9   |
| <input checked="" type="checkbox"/> Early apoptotic - monocytes | 96.9  |

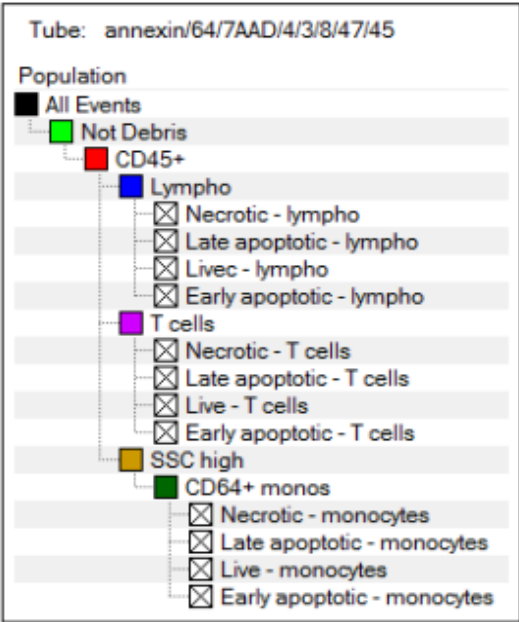

Patient 5 ECP MNC 4

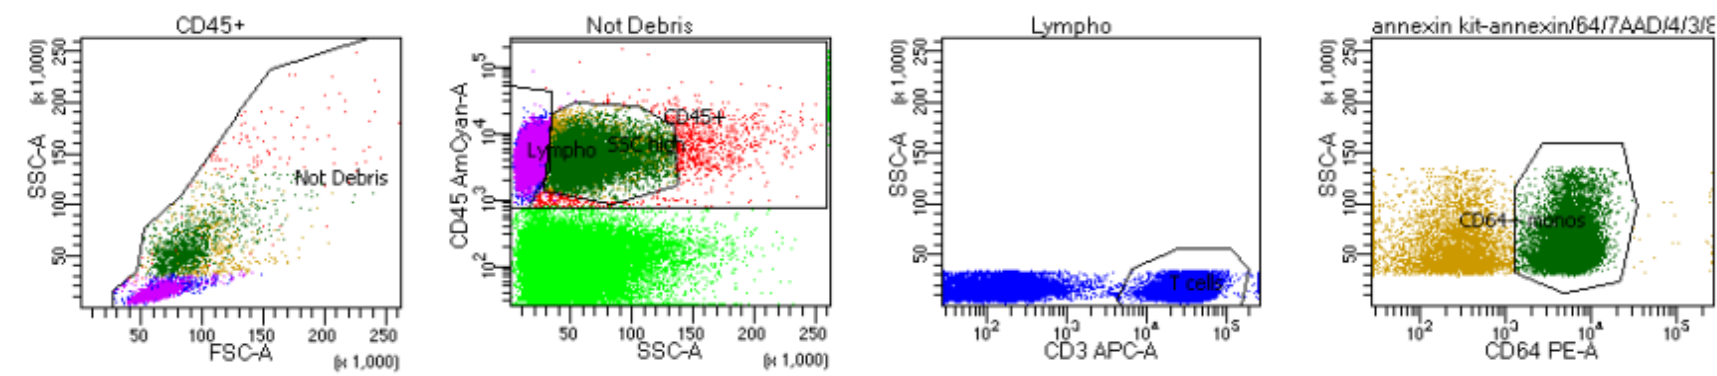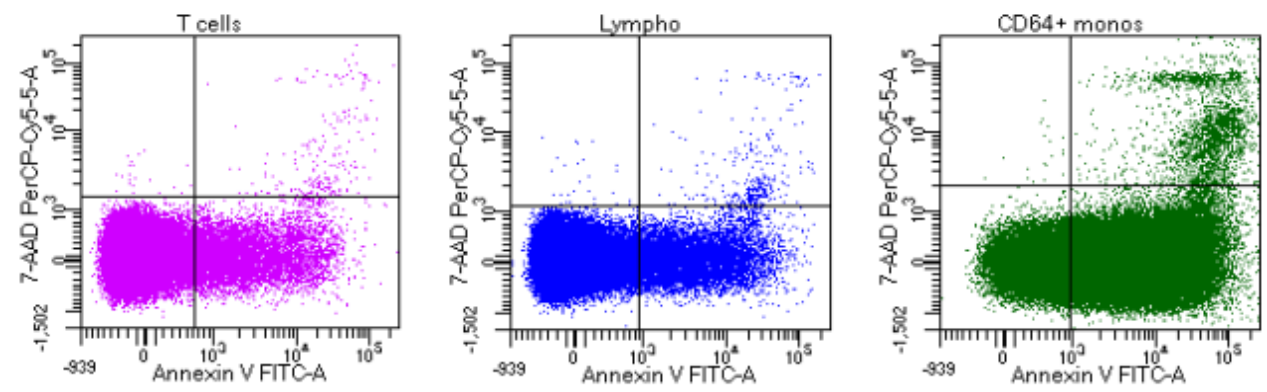

| Population                | %Parent |
|---------------------------|---------|
| Necrotic - T cells        | 0.0     |
| Late apoptotic - T cells  | 0.3     |
| Live - T cells            | 87.9    |
| Early apoptotic - T cells | 11.8    |

| Population               | %Parent |
|--------------------------|---------|
| Necrotic - lympho        | 0.1     |
| Late apoptotic - lympho  | 0.5     |
| Live - lympho            | 86.6    |
| Early apoptotic - lympho | 12.9    |

| Population                  | %P... |
|-----------------------------|-------|
| Necrotic - monocytes        | 0.0   |
| Late apoptotic - monocytes  | 1.8   |
| Live - monocytes            | 16.9  |
| Early apoptotic - monocytes | 81.3  |

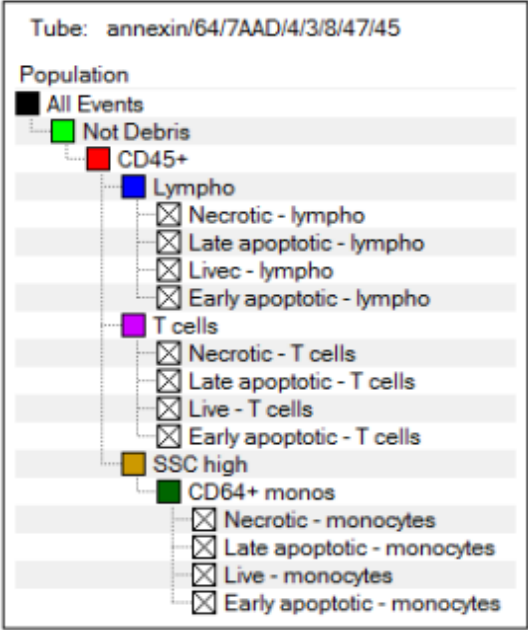



Patient 6 ECP MNC 1

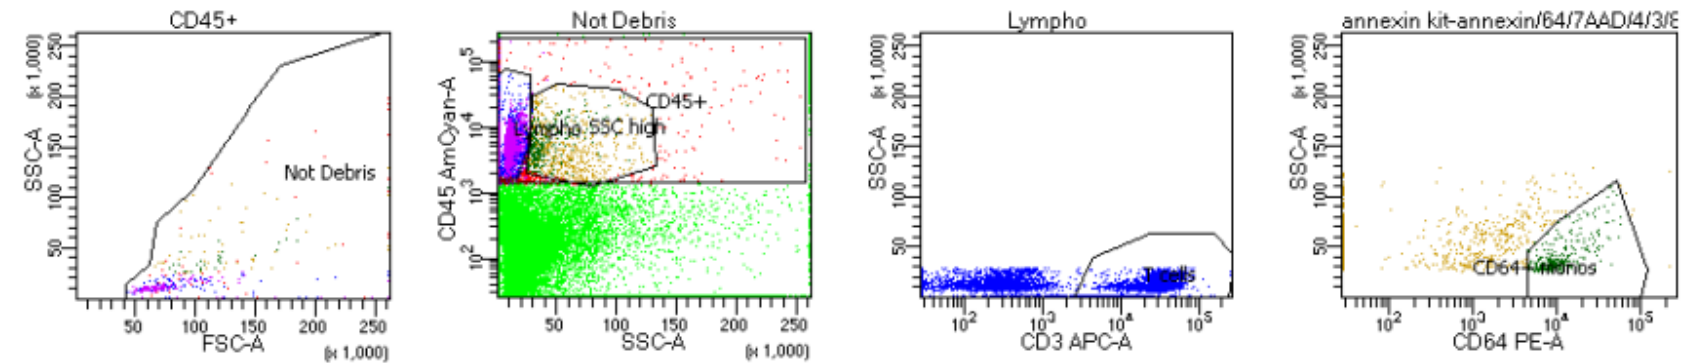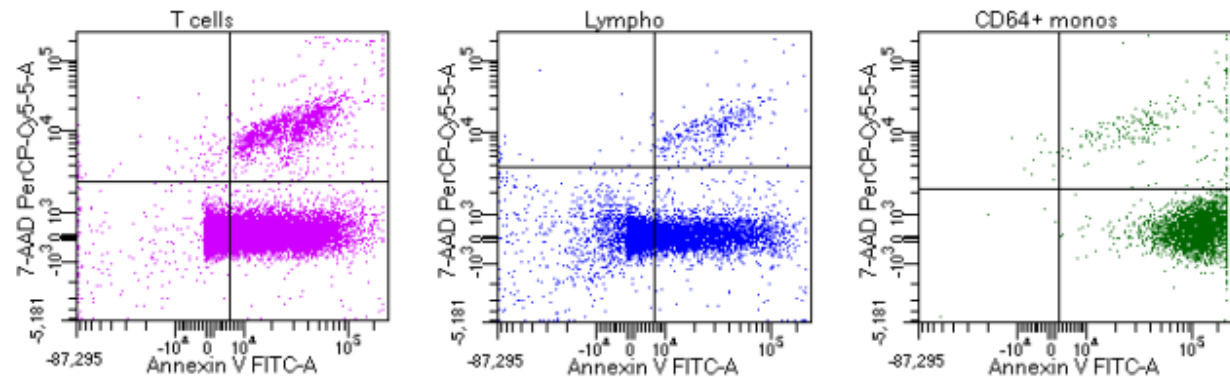

| Population                                                    | %Parent |
|---------------------------------------------------------------|---------|
| <input checked="" type="checkbox"/> Necrotic - T cells        | 0.5     |
| <input checked="" type="checkbox"/> Late apoptotic - T cells  | 8.0     |
| <input checked="" type="checkbox"/> Live - T cells            | 39.2    |
| <input checked="" type="checkbox"/> Early apoptotic - T cells | 52.3    |

| Population                                                   | %Parent |
|--------------------------------------------------------------|---------|
| <input checked="" type="checkbox"/> Necrotic - lympho        | 0.4     |
| <input checked="" type="checkbox"/> Late apoptotic - lympho  | 4.5     |
| <input checked="" type="checkbox"/> Livec - lympho           | 52.2    |
| <input checked="" type="checkbox"/> Early apoptotic - lympho | 42.9    |

| Population                                                      | %P... |
|-----------------------------------------------------------------|-------|
| <input checked="" type="checkbox"/> Necrotic - monocytes        | 0.4   |
| <input checked="" type="checkbox"/> Late apoptotic - monocytes  | 7.3   |
| <input checked="" type="checkbox"/> Live - monocytes            | 0.1   |
| <input checked="" type="checkbox"/> Early apoptotic - monocytes | 92.1  |

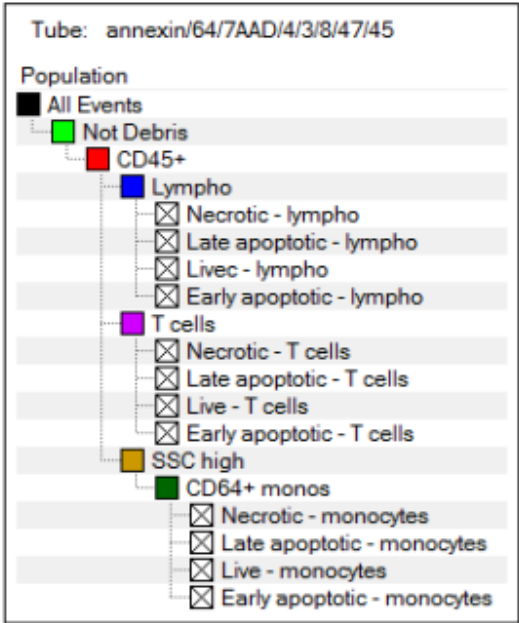

Patient 6 ECP MNC 2

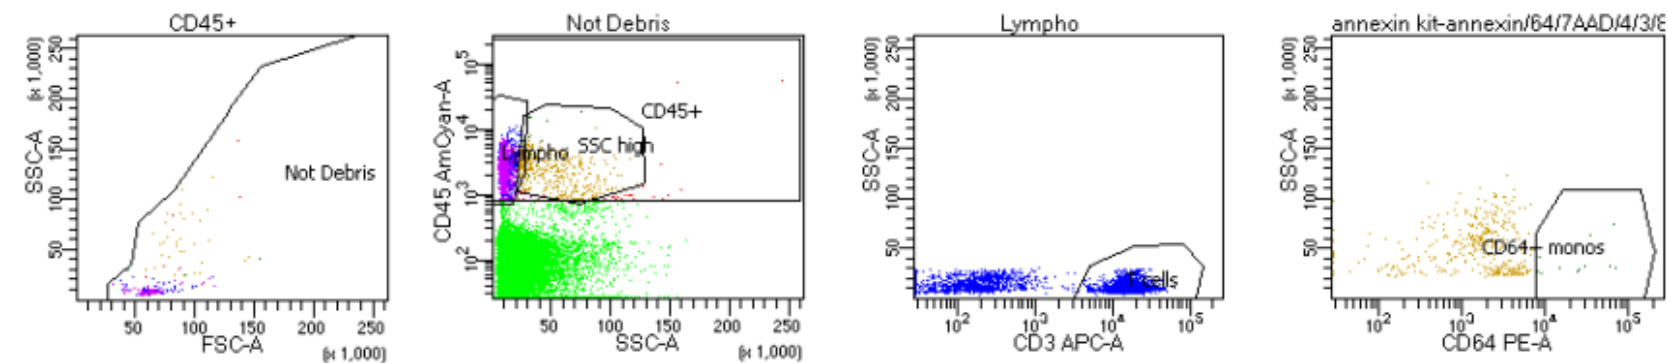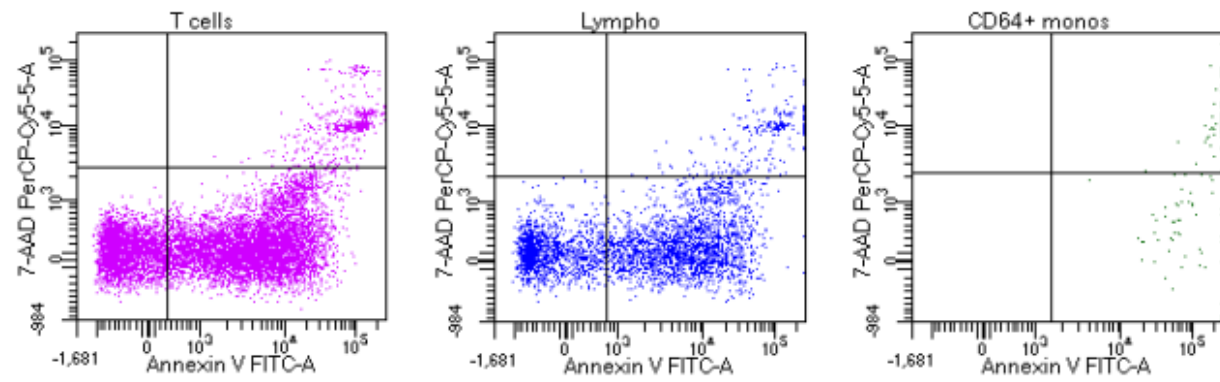

| Population                                                    | %Parent |
|---------------------------------------------------------------|---------|
| <input checked="" type="checkbox"/> Necrotic - T cells        | 0.0     |
| <input checked="" type="checkbox"/> Late apoptotic - T cells  | 5.3     |
| <input checked="" type="checkbox"/> Live - T cells            | 31.6    |
| <input checked="" type="checkbox"/> Early apoptotic - T cells | 63.2    |

| Population                                                   | %Parent |
|--------------------------------------------------------------|---------|
| <input checked="" type="checkbox"/> Necrotic - lympho        | 0.0     |
| <input checked="" type="checkbox"/> Late apoptotic - lympho  | 6.8     |
| <input checked="" type="checkbox"/> Livec - lympho           | 35.5    |
| <input checked="" type="checkbox"/> Early apoptotic - lympho | 57.6    |

| Population                                                      | %P... |
|-----------------------------------------------------------------|-------|
| <input checked="" type="checkbox"/> Necrotic - monocytes        | 0.0   |
| <input checked="" type="checkbox"/> Late apoptotic - monocytes  | 59.9  |
| <input checked="" type="checkbox"/> Live - monocytes            | 0.0   |
| <input checked="" type="checkbox"/> Early apoptotic - monocytes | 40.1  |

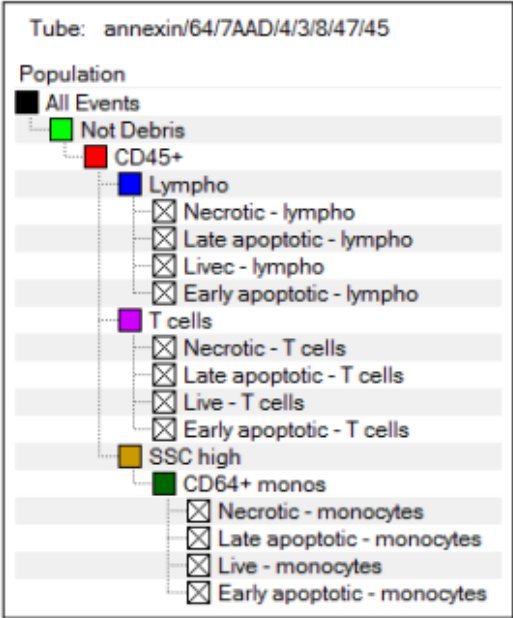

Patient 6 ECP MNC 3

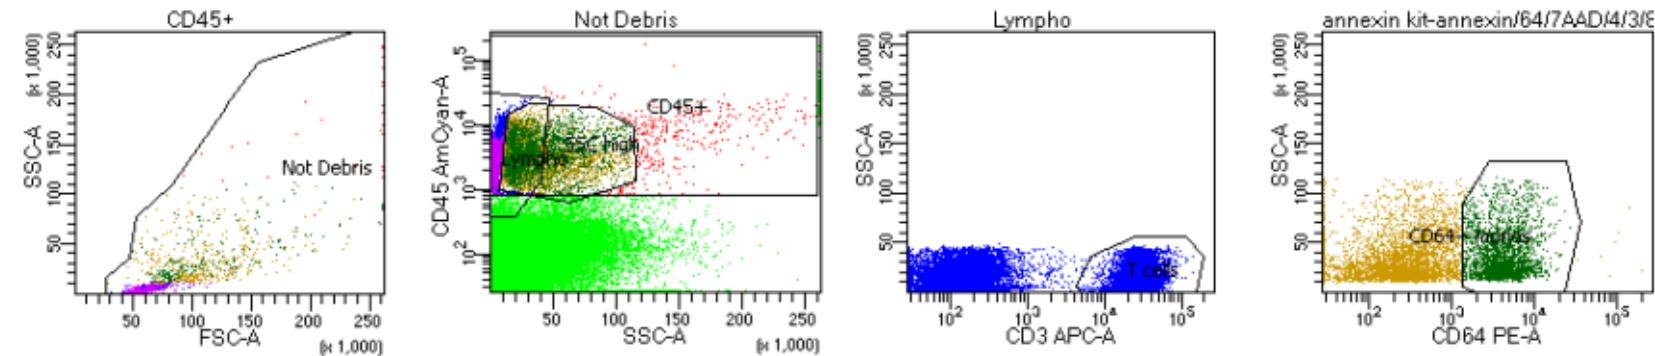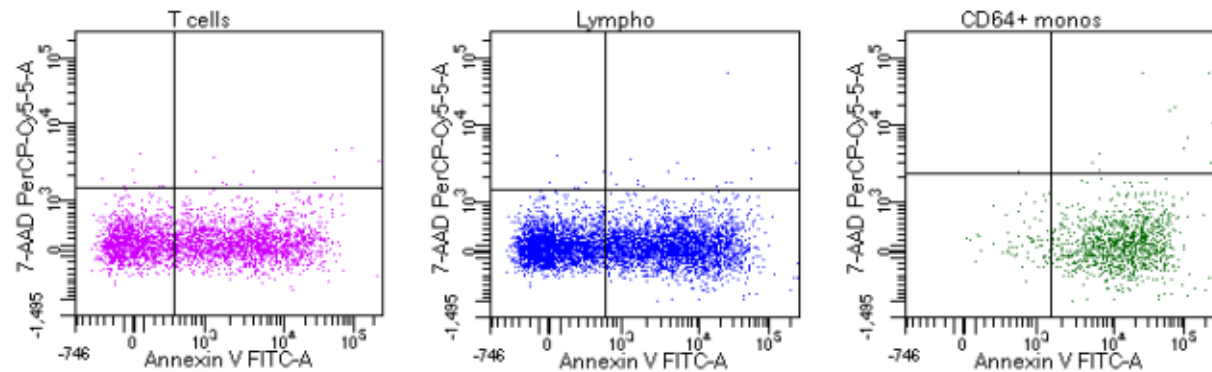

| Population                                                    | %Parent |
|---------------------------------------------------------------|---------|
| <input checked="" type="checkbox"/> Necrotic - T cells        | 0.2     |
| <input checked="" type="checkbox"/> Late apoptotic - T cells  | 0.5     |
| <input checked="" type="checkbox"/> Live - T cells            | 42.4    |
| <input checked="" type="checkbox"/> Early apoptotic - T cells | 56.9    |

| Population                                                   | %Parent |
|--------------------------------------------------------------|---------|
| <input checked="" type="checkbox"/> Necrotic - lympho        | 0.2     |
| <input checked="" type="checkbox"/> Late apoptotic - lympho  | 0.5     |
| <input checked="" type="checkbox"/> Live - lympho            | 45.6    |
| <input checked="" type="checkbox"/> Early apoptotic - lympho | 53.7    |

| Population                                                      | %P... |
|-----------------------------------------------------------------|-------|
| <input checked="" type="checkbox"/> Necrotic - monocytes        | 0.0   |
| <input checked="" type="checkbox"/> Late apoptotic - monocytes  | 1.1   |
| <input checked="" type="checkbox"/> Live - monocytes            | 6.3   |
| <input checked="" type="checkbox"/> Early apoptotic - monocytes | 92.5  |

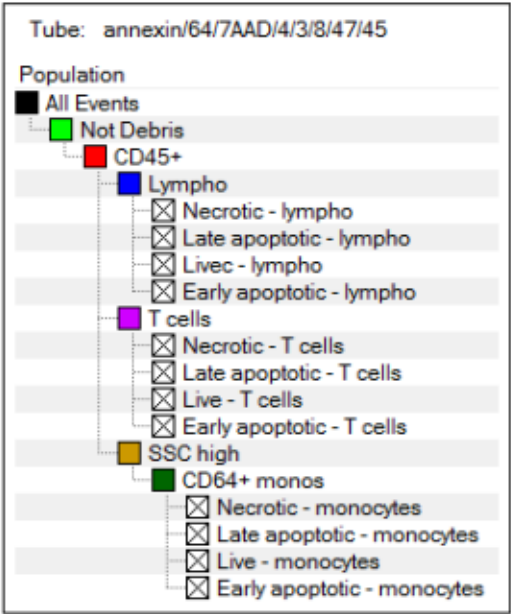

Patient 6 ECP MNC 4

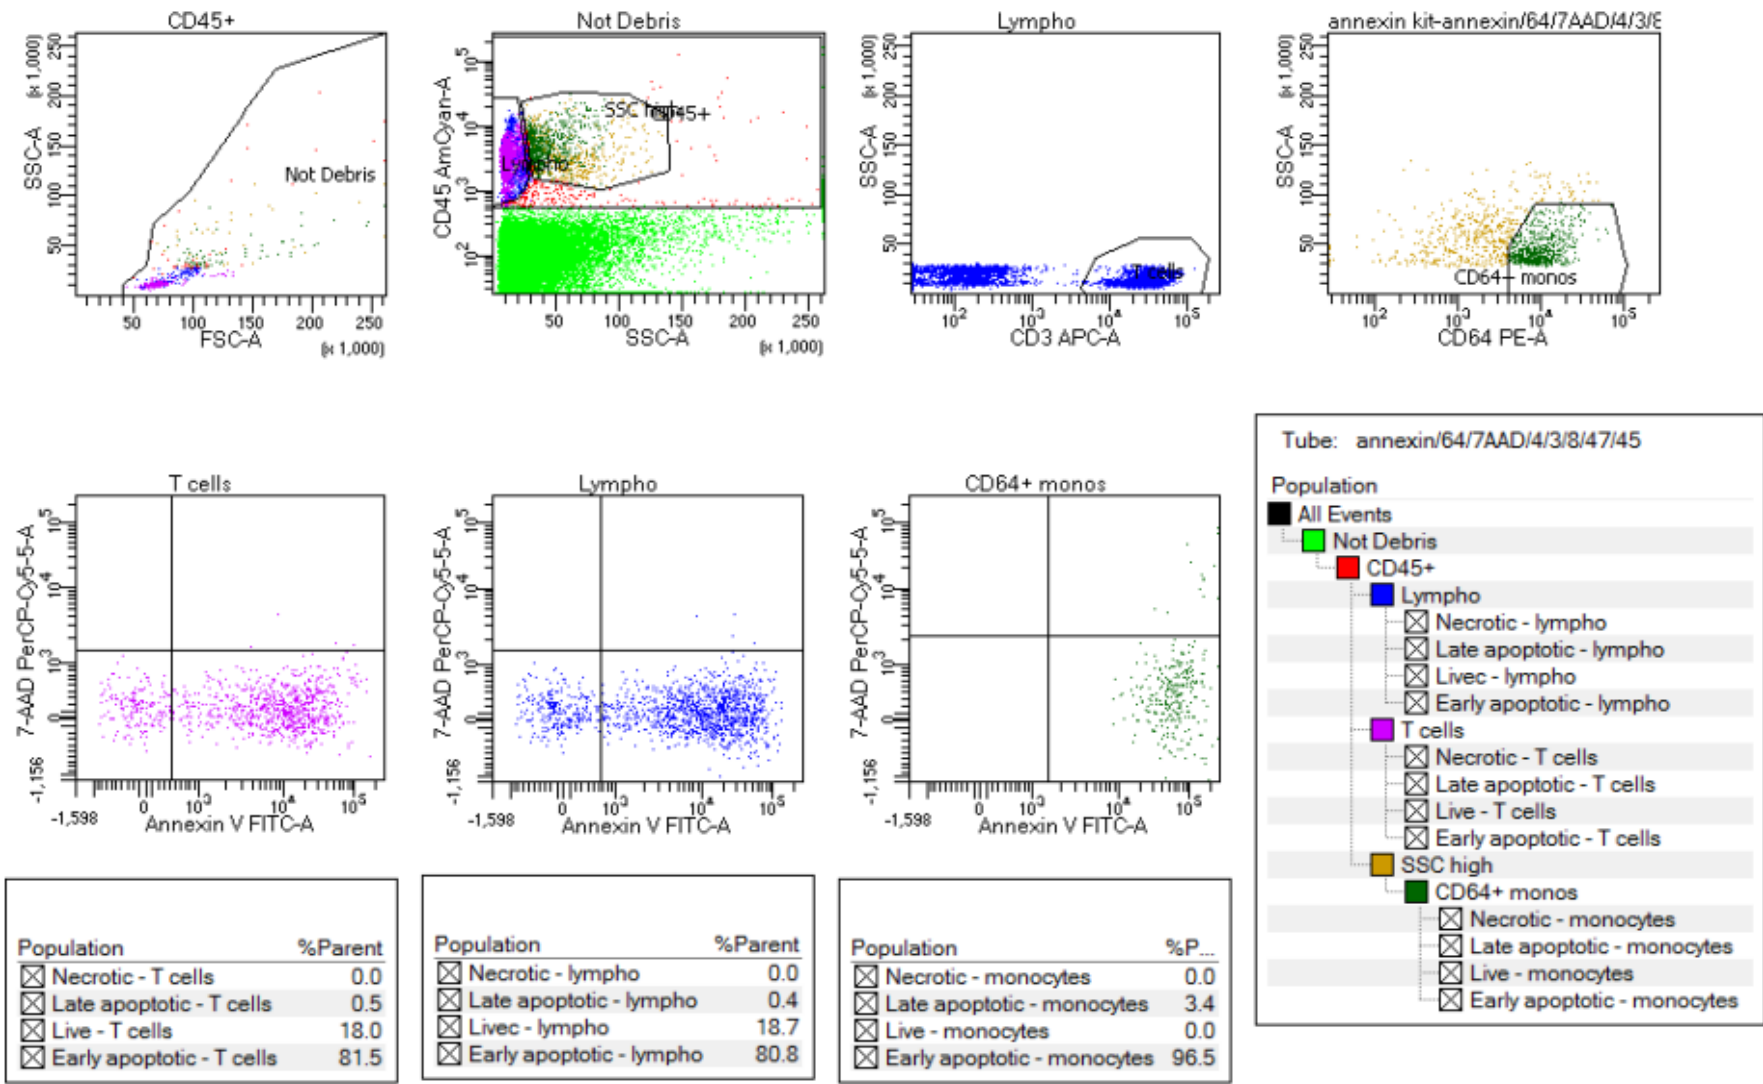



Patient 7 ECP MNC 1

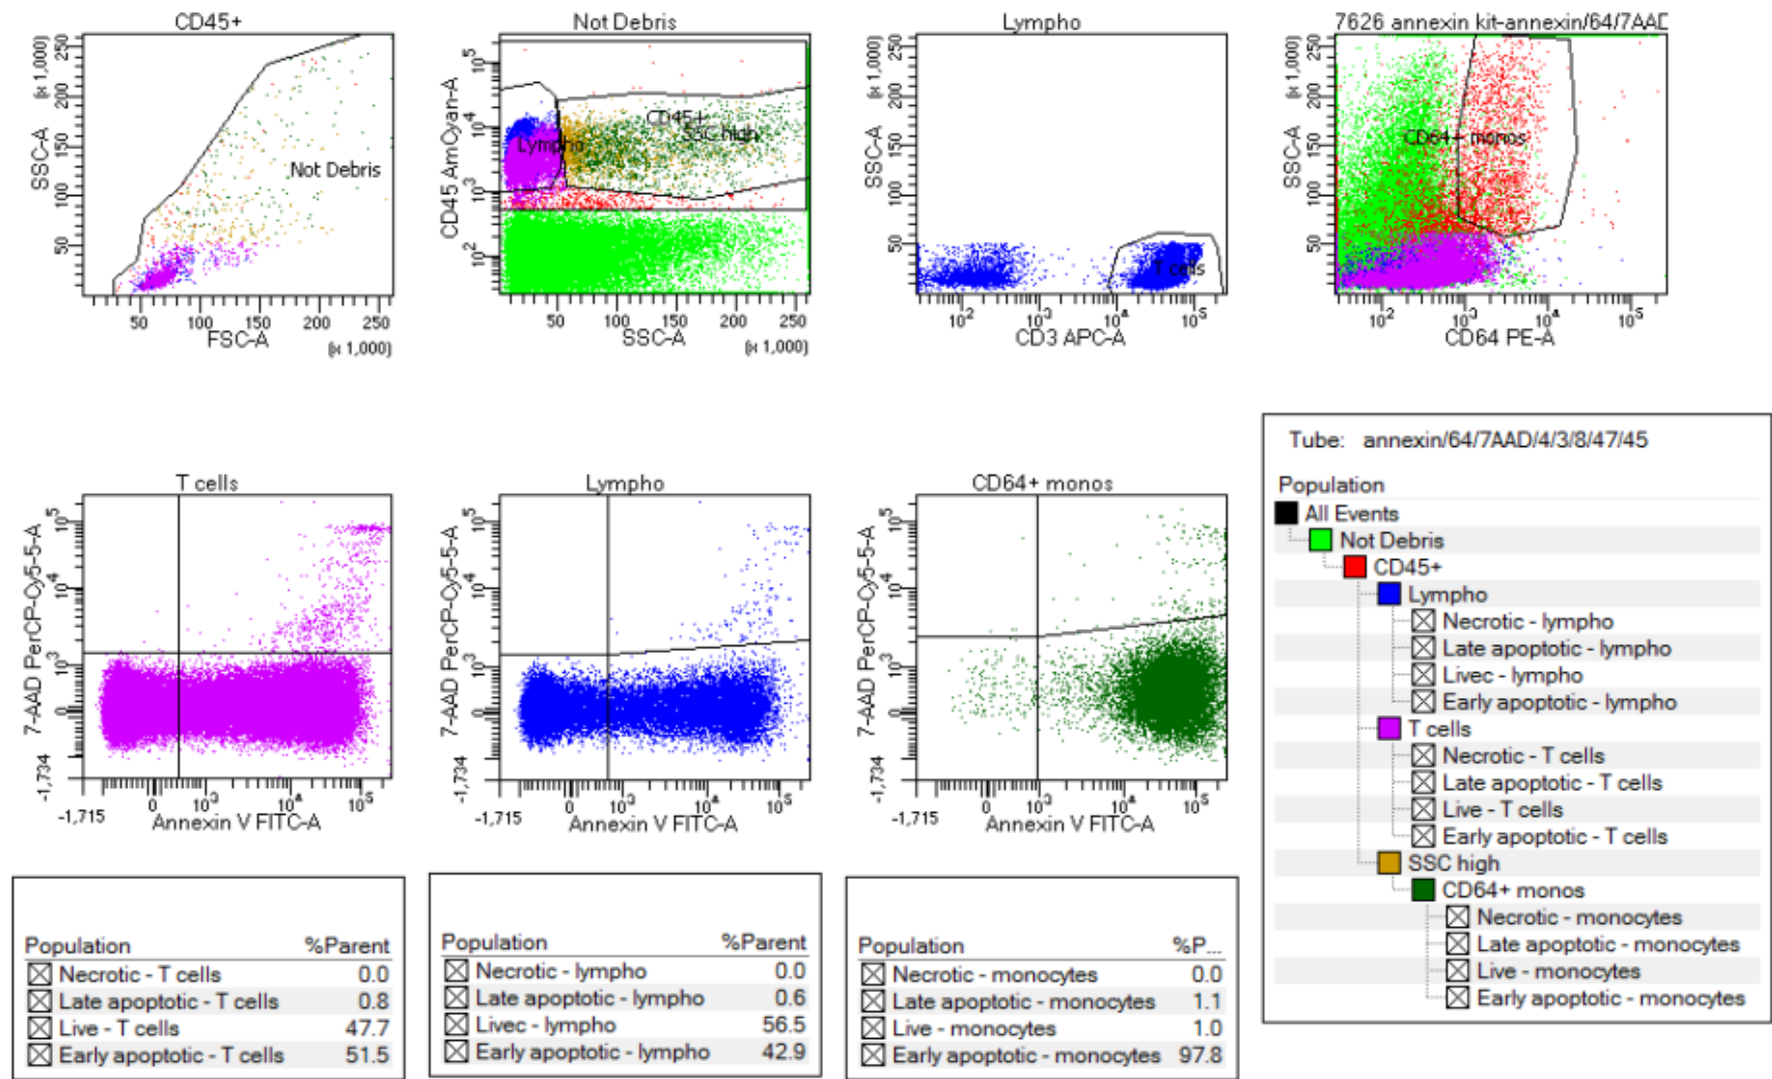

Patient 7 ECP MNC 2

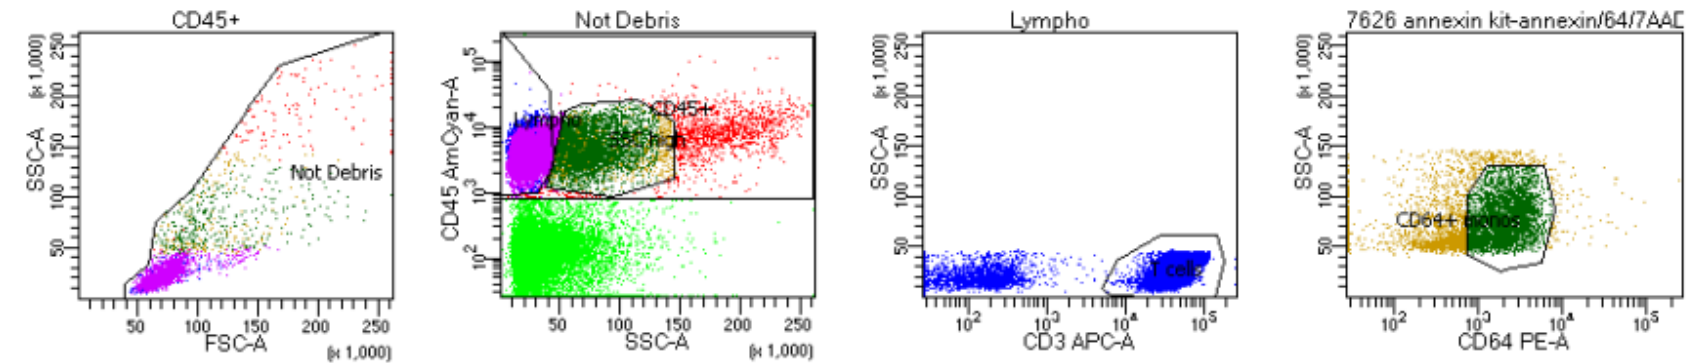

| Population                                                    | %Parent |
|---------------------------------------------------------------|---------|
| <input checked="" type="checkbox"/> Necrotic - T cells        | 0.0     |
| <input checked="" type="checkbox"/> Late apoptotic - T cells  | 0.4     |
| <input checked="" type="checkbox"/> Live - T cells            | 32.9    |
| <input checked="" type="checkbox"/> Early apoptotic - T cells | 66.8    |

| Population                                                   | %Parent |
|--------------------------------------------------------------|---------|
| <input checked="" type="checkbox"/> Necrotic - lympho        | 0.0     |
| <input checked="" type="checkbox"/> Late apoptotic - lympho  | 0.3     |
| <input checked="" type="checkbox"/> Live - lympho            | 41.4    |
| <input checked="" type="checkbox"/> Early apoptotic - lympho | 58.3    |

| Population                                                      | %P... |
|-----------------------------------------------------------------|-------|
| <input checked="" type="checkbox"/> Necrotic - monocytes        | 0.0   |
| <input checked="" type="checkbox"/> Late apoptotic - monocytes  | 1.1   |
| <input checked="" type="checkbox"/> Live - monocytes            | 0.5   |
| <input checked="" type="checkbox"/> Early apoptotic - monocytes | 98.4  |

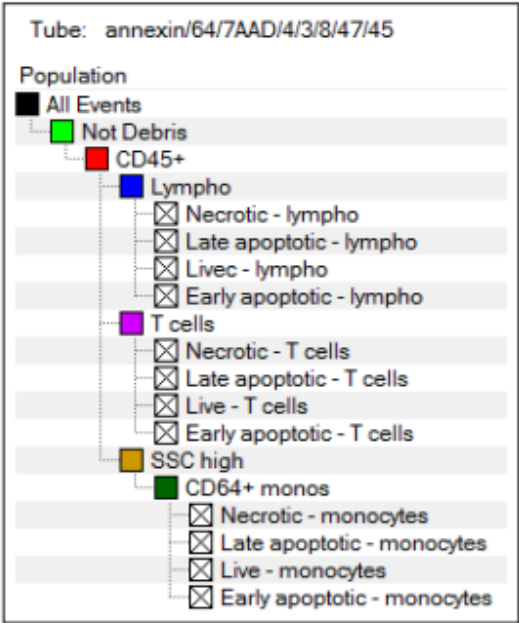

Patient 7 ECP MNC 3

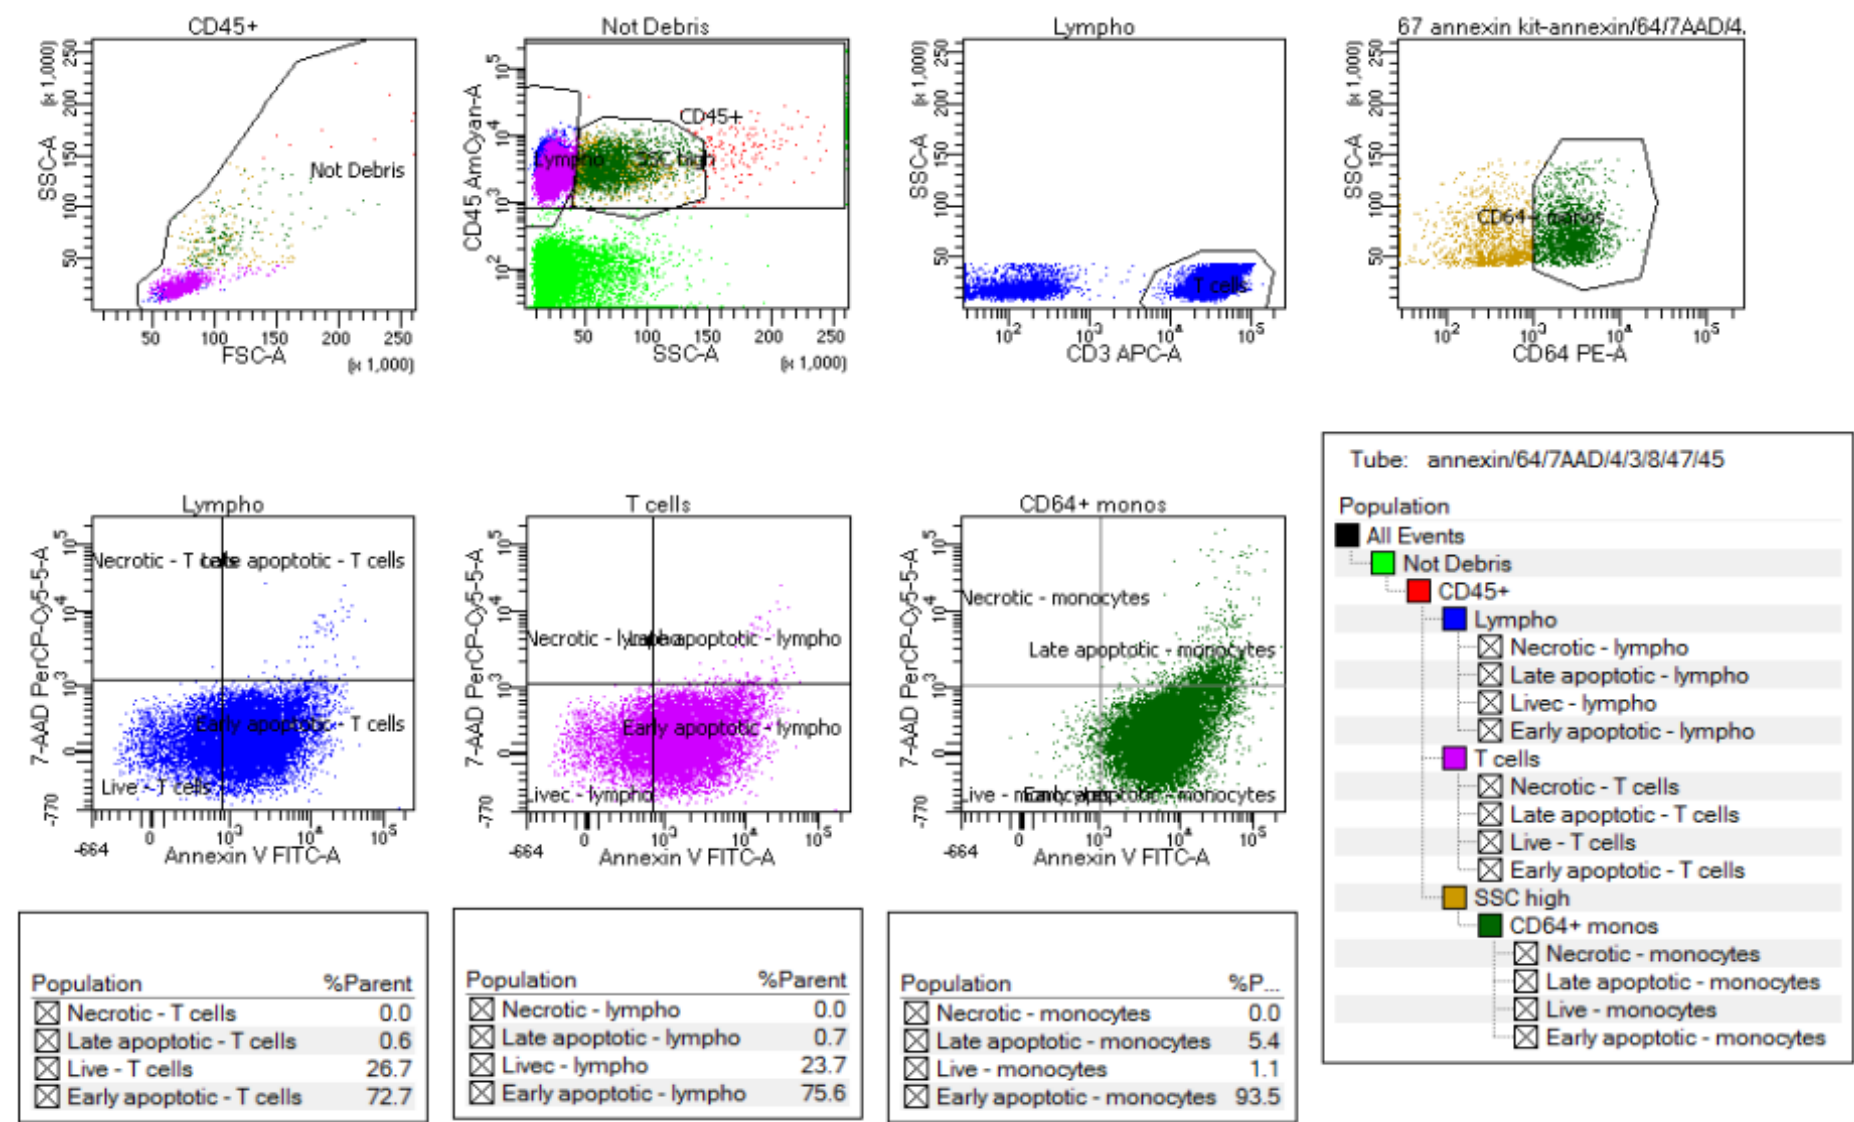

Patient 7 ECP MNC 4

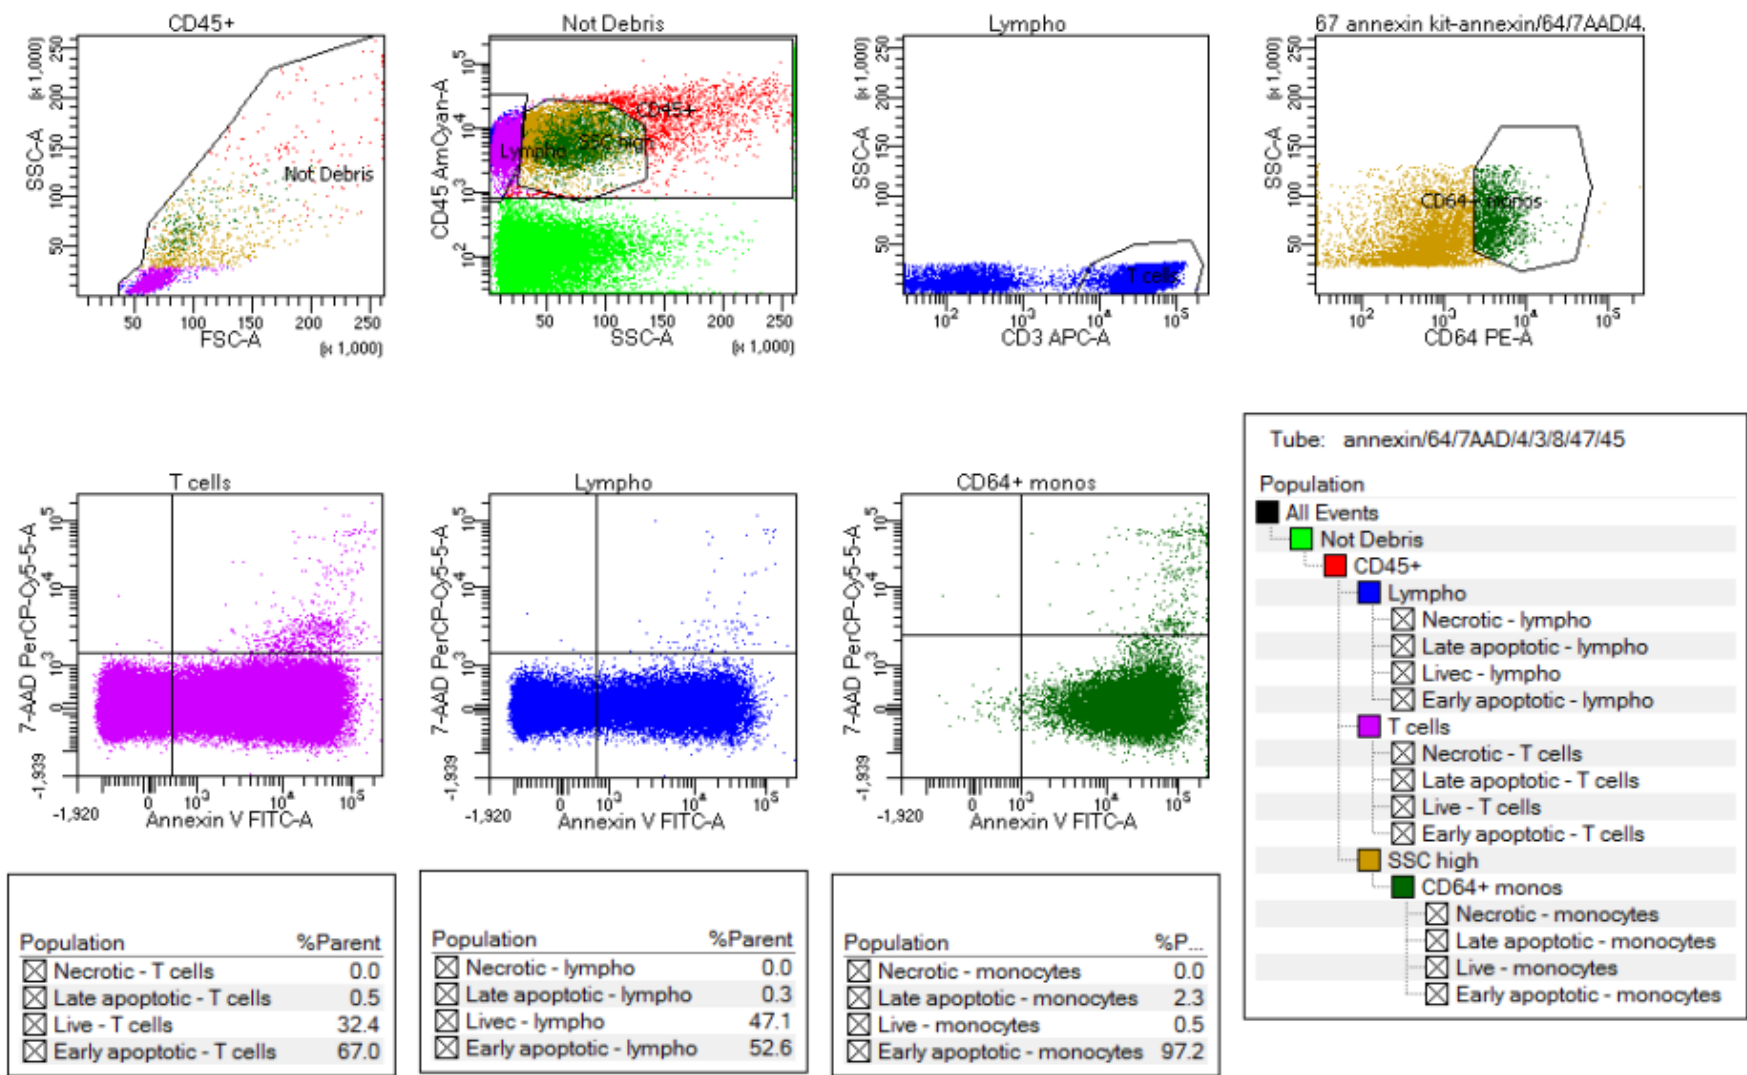

Supplement: s1 [file s1]
