# Supplementary material for: Extracorporeal Photopheresis as a Possible Therapeutic Approach for Adults with Severe and Critical COVID-19 Non-Responsive to Standard Treatment: A Pilot Investigational Study
Source: MDPI journal article supplement (doi:10.3390/jcm12155000), 2023-07-29
Supplement: s1 [file s1]

## SUPPLEMENTARY TABLE

**Supplementary Table S2.** FACS with early and late apoptosis markers and multi-cytokine analysis from ECP mononuclear cell collections (MNC) after ECP sessions 1 (first) to 4 (last) of patients enrolled in the study.

| PARAMETER                                        | ECP MNC1              | ECP MNC2              | ECP MNC3              | ECP MNC4               | <i>p</i> value* |
|--------------------------------------------------|-----------------------|-----------------------|-----------------------|------------------------|-----------------|
| <b>Regulatory T cell ratio (%)</b>               | 0.5±0.5 (0.2–1.0)     | 0.5±0.7 (0.2–2.3)     | 0.3±0.3 (0.1–0.7)     | 0.4±1.2 (0.1–2.1)      | 0.93            |
| <b>CD3+ T cell count (cells/μl)</b>              | 3059±3843 (708–18449) | 3275±2679 (860–24117) | 1955±6271 (726–35996) | 2184±5632 (302–21951)  | 0.72            |
| <b>CD3+/CD8+ T cell count (cells/μl)</b>         | 1932±1606 (246–4177)  | 1942±1235 (301–3191)  | 1093±1179 (343–2932)  | 1098±1457 (135–2371)   | 0.87            |
| <b>CD3+/CD4+ T cell count (cells/μl)</b>         | 2064±2008 (347–16481) | 1420±1694 (260–22082) | 875±4995 (287–32992)  | 873±4500 (159–19468)   | 0.49            |
| <b>CD3-/CD16+/CD56+ NK cell count (cells/μl)</b> | 232±242 (105–2231)    | 186±245 (59–2160)     | 160±88 (66–761)       | 85±78 (42–708)         | 0.26            |
| <b>CD19+ B cell count (cells/μl)</b>             | 237±1126 (0–2349)     | 211±1304 (0–2464)     | 562±2691 (0–5074)     | 764±2601 (0–4346)      | 0.79            |
| <b>Double negative T cell ratio (%)</b>          | 2.3±2.8 (0.1–13.1)    | 1.3±1.6 (0.2–8.4)     | 1.1±1.3 (0.1–6.1)     | 0.7±0.8 (0.2–4.5)      | 0.81            |
| <b>Double positive T cell ratio (%)</b>          | 0.1±0.2 (0–1.3)       | 0.1±0.1 (0–1.3)       | 0.1±0.1 (0–1.1)       | 0.1±0.3 (0–1.3)        | 0.58            |
| <b>Counts within the CD3+ gate:</b>              |                       |                       |                       |                        |                 |
| CD3+/TCRab+ T cell (cells/μl)                    | 2734±1360 (707–5215)  | 3521±1400 (8464620)   | 1030±9029 (689–35888) | 1167±6773 (292–21864)  | 0.84            |
| CD3+/TCRgd+ T cell (cells/μl)                    | 65±152 (0.9–228)      | 123±52 (43–149)       | 40±57 (2–82)          | 8±29 (0.3–78)          | 0.3             |
| CD3+/CD25+ T cell (cells/μl)                     | 375±323 (42–763)      | 119±778 (25–1582)     | 189±256 (17–467)      | 89±199 (9–258)         | <b>0.04</b>     |
| CD3+/HLA-DR+ T cell (cells/μl)                   | 292±341 (52–1005)     | 267±815 (65–1696)     | 424±1414 (43–5378)    | 253±283 (0.1–357)      | 0.67            |
| <b>Counts within the CD4+ gate:</b>              |                       |                       |                       |                        |                 |
| CD4+/CD45RA+ naive T cell (cells/μl)             | 200±1029 (29–1408)    | 717±316 (88–813)      | 96±7708 (33–30815)    | 104±2557 (39–17579)    | 0.12            |
| CD4+/CD45RO+ memory T cell (cells/μl)            | 465±554 (190–1494)    | 1000±631 (173–1599)   | 449±787 (202–2177)    | 604±1487 (119–3710)    | 0.88            |
| <b>Counts within the CD8+ gate:</b>              |                       |                       |                       |                        |                 |
| CD8+/CD45RA+ naive T cell (cells/μl)             | 848±1365 (152–1973)   | 1042±1362 (469–2581)  | 354±287 (146–703)     | 415±347 (95–770)       | 0.52            |
| CD8+/CD45RO+ memory T cell (cells/μl)            | 243±293 (81–654)      | 330±123 (146–584)     | 240±718 (85–2234)     | 251±504 (39–1864)      | 0.88            |
| <b>Lymphocyte apoptosis markers (%):</b>         |                       |                       |                       |                        |                 |
| - Live lymphocytes                               | 64.4±15.5 (0.6–81.6)  | 59.2±35.5 (41.4–96.9) | 54.3±24.7 (23.7–79.8) | 52.3±14.5 (41.4–86.6)  | 0.81            |
| - Necrotic lymphocytes                           | 0                     | 0±0.1 (0–0.5)         | 0                     | 0                      | n.a.            |
| - Early apoptotic lymphocytes                    | 35.1±15.9 (18.4–98.1) | 39.9±35.7 (3.0–58.3)  | 43.5±23.6 (19.6–75.6) | 51.2±11.5 (34.6–129.0) | 0.74            |
| - Late apoptotic lymphocytes                     | 0.6±0.5 (0–1.3)       | 0.4±0.4 (0.1–0.9)     | 0.4±0.5 (0.1–4.3)     | 0.4±0.3 (0.1–1.0)      | 0.93            |
| <b>T cell apoptosis markers (%):</b>             |                       |                       |                       |                        |                 |
| - Live T cells                                   | 60.8±25.8 (2.1–72.1)  | 59.6±35.0 (32.9–94.5) | 61.4±30.2 (26.7–83.4) | 51.7±32.2 (32.4–87.9)  | 0.41            |
| - Necrotic T cells                               | 0                     | 0±0.1 (0–1.0)         | 0                     | 0                      | n.a.            |
| - Early apoptotic T cells                        | 38.7±26.0 (27.8–97.7) | 39.4±35.3 (5.3–66.8)  | 35.8±28.8 (16.0–72.7) | 47.6±32.8 (11.8–67.0)  | 0.55            |
| - Late apoptotic T cells                         | 0.5±0.5 (0–0.9)       | 0.4±0.4 (0.2–1.0)     | 0.4±0.4 (0.1–5.2)     | 0.5±0.5 (0.1–1.0)      | 0.93            |
| <b>Monocyte apoptosis markers (%):</b>           |                       |                       |                       |                        |                 |
| - Live monocytes                                 | 0.4±2.6 (0–14.8)      | 0.5±0.5 (0–74)        | 0.7±0.8 (0.1–10.6)    | 0.5±12.5 (0.2–30.1)    | 0.41            |
| - Necrotic monocytes                             | 0                     | 0                     | 0                     | 0                      | n.a.            |
| - Early apoptotic monocytes                      | 97.8±7.6 (84.0–99.5)  | 97.6±6.2 (25.2–98.5)  | 95.2±5.3 (88.8–99.4)  | 95.9±13.9 (68.2–99.0)  | 0.68            |
| - Late apoptotic monocytes                       | 1.3±1.2 (0.4–10.4)    | 1.4±1.2 (0.6–12.7)    | 1.5±3.9 (0.5–6.5)     | 1.8±1.2 (0.6–4.9)      | 0.5             |
| <b>Serum interferon-α (pg/ml)</b>                | 24.3±19.8 (8.0–36.5)  | 32.6±31.0 (8.–55.5)   | 11.4±10.5 (8.0–55.5)  | 8.0±12.2 (3.4–39.3)    | 0.1             |
| <b>Serum interferon-γ (pg/ml)</b>                | 1.3±0.8 (1.3–4.5)     | 1.3±2.0 (1.3–5.6)     | 1.3±0.1 (1.3–5.0)     | 1.3±1.9 (1.3–11.8)     | 0.75            |
| <b>Plasma interleukin-1α (pg/ml)</b>             | 4.8±8.1 (4.8–45.4)    | 4.8±9.7 (4.8–36.8)    | 8.8±69.2 (4.8–221.8)  | 11.0±7.7 (4.8–32.9)    | 0.09            |
| <b>Plasma interleukin-1β (pg/ml)</b>             | 1.6±0.5 (1.6–7.7)     | 1.6±1.4 (1.6–4.7)     | 1.6±0.1 (1.6–4.7)     | 1.6±0.1 (1.6–6.4)      | 0.56            |
| <b>Plasma interleukin-2 (pg/ml)</b>              | 0.6±0.1 (0.6–1.0)     | 0.6±0.1 (0.6–0.7)     | 0.6±0.1 (0.6–0.8)     | 0.6±0.1 (0.6–1.4)      | 1.0             |
| <b>Plasma interleukin-4 (pg/ml)</b>              | 0.7±0.5 (0.6–2.8)     | 1.0±3.2 (0.6–8.6)     | 0.6±0.3 (0.6–1.6)     | 0.6±0.3 (0.6–1.2)      | 0.39            |
| <b>Plasma interleukin-5 (pg/ml)</b>              | 4.0±8.7 (0.7–32.7)    | 4.5±3.2 (0.6–8.3)     | 1.7±1.2 (0.6–5.1)     | 3.5±3.9 (1.0–5.9)      | 0.68            |

|                                               |                                 |                                |                                 |                               |      |
|-----------------------------------------------|---------------------------------|--------------------------------|---------------------------------|-------------------------------|------|
| <b>Plasma interleukin-6 (pg/ml)</b>           | 102.1±191.1 (7.7–7005.0)        | 58.2±107.5 (4.0–863.2)         | 51.5±386.8 (7.9–2292.7)         | 30.2±486.7 (9.7–4411.9)       | 0.81 |
| <b>Plasma interleukin-8 (pg/ml)</b>           | 4.8±7.8 (0.9–20.2)              | 3.3±6.5 (0.6–14.6)             | 4.2±3.7 (0.6–9.6)               | 3.0±2.2 (0.8–6.3)             | 0.36 |
| <b>Plasma interleukin-10 (pg/ml)</b>          | 12.6±8.2 (2.6–28.7)             | 10.5±7.4 (2.6–17.3)            | 16.4±40.6 (2.6–92.1)            | 13.0±40.8 (2.6–91.7)          | 0.93 |
| <b>Plasma interleukin-12 (pg/ml)</b>          | 3.0±0.1 (3.0–3.0)               | 3.0±1.3 (3.0–6.2)              | 3.0±0.7 (3.0–7.0)               | 3.0±0.7 (3.0–18.2)            | 0.24 |
| <b>Plasma interleukin-13 (pg/ml)</b>          | 16.1±14.5 (6.4–48.3)            | 10.7±35.4 (6.4–63.5)           | 6.4±7.3 (6.4–63.5)              | 6.4±7.3 (6.4–31.4)            | 0.32 |
| <b>Plasma interleukin-15 (pg/ml)</b>          | 4.5±4.1 (3.0–11.5)              | 4.1±3.0 (3.0–10.3)             | 4.1±3.9 (3.0–8.9)               | 5.7±4.8 (3.0–8.4)             | 0.95 |
| <b>Plasma interleukin-17A (pg/ml)</b>         | 1.3±2.2 (1.3–5.2)               | 2.4±3.3 (1.3–6.1)              | 1.3±0.1 (1.3–2.7)               | 1.3±0.1 (1.3–2.7)             | 0.42 |
| <b>Serum IP-10 (pg/ml)</b>                    | 488.5±1777.0<br>(48.7–10731.5)  | 263.7±767.5<br>(51.3–1269.4)   | 153.4±205.7<br>(33.6–487.6)     | 121.8±549.1<br>(52.1–1567.4)  | 0.23 |
| <b>Serum MCP-1 (pg/ml)</b>                    | 188.5±258.0<br>(78.9–2401.7)    | 164.6±90.4<br>(90.0–479.4)     | 147.8±139.8<br>(23.5–497.3)     | 179.2±204.9<br>(25.9–471.1)   | 0.75 |
| <b>Serum MIP-1<math>\alpha</math> (pg/ml)</b> | 15.1±15.2 (3.0–25.1)            | 13.1±2.9 (3.0–26.2)            | 10.6±15.4 (3.0–22.9)            | 8.3±20.8 (3.0–34.5)           | 0.56 |
| <b>Serum RANTES (pg/ml)</b>                   | 1093.8±1235.3<br>(650.0–2623.2) | 1100.8±274.3<br>(730.8–2149.5) | 1416.5±1025.7<br>(383.2–2608.6) | 1107.1±416.1<br>(93.3–2250.2) | 0.97 |
| <b>Serum TNF-<math>\alpha</math> (pg/ml)</b>  | 19.2±32.0 (13.0–134.6)          | 22.7±25.6 (8.7–46.3)           | 20.0±60.5 (9.1–153.6)           | 21.8±68.1 (11.5–193.1)        | 0.52 |
| <b>Serum TNF-<math>\beta</math> (pg/ml)</b>   | 4.8±8.2 (1.6–15.5)              | 1.6±18.1 (1.6–21.9)            | 1.6±0.1 (1.6–9.8)               | 1.6±1.3 (1.6–6.6)             | 0.18 |

\* *p* values are calculated between data measured from ECP MNC1 (first session) and ECP MNC4 (last session).

n.a.: not applicable
